## **SARS-CoV-2 neutralizing human recombinant antibodies selected from pre-pandemic healthy donors binding at RBD-ACE2 interface**

Federico Bertoglio<sup>1\*</sup>, Doris Meier<sup>1\*</sup>, Nora Langreder<sup>1\*</sup>, Stephan Steinke<sup>1\*</sup>, Ulfert Rand<sup>2\*</sup>, Luca Simonelli<sup>3</sup>, Philip Alexander Heine<sup>1</sup>, Rico Ballmann<sup>1</sup>, Kai-Thomas Schneider<sup>1</sup>, Kristian Daniel Ralph Roth<sup>1</sup>, Maximilian Ruschig<sup>1</sup>, Peggy Riese<sup>1,2</sup>, Kathrin Eschke<sup>2</sup>, Yeonsu Kim<sup>2</sup>, Dorina Schäckermann<sup>1</sup>, Mattia Pedotti<sup>3</sup>, Philipp Kuhn<sup>4</sup>, Susanne Zock-Emmenthal<sup>5</sup>, Johannes Wöhrle<sup>6</sup>, Marlies Becker<sup>1</sup>, Martina Grasshoff<sup>7</sup>, Esther Veronika Wenzel<sup>1</sup>, Giulio Russo<sup>1</sup>, Andrea Kröger<sup>7</sup>, Linda Brunotte<sup>8</sup>, Stephan Ludwig<sup>8</sup>, Viola Fühner<sup>1</sup>, Stefan Daniel Krämer<sup>6</sup>, Stefan Dübel<sup>1</sup>, Luca Varani<sup>3</sup>, Günter Roth<sup>6#</sup>, Luka Čičin-Šain<sup>2,9#</sup>, Maren Schubert<sup>1#</sup>, Michael Hust<sup>1#</sup>

<sup>1</sup> Technische Universität Braunschweig, Institut für Biochemie, Biotechnologie und Bioinformatik, Abteilung Biotechnologie, Spielmannstr. 7, 38106 Braunschweig

<sup>2</sup> Helmholtz Centre for Infection Research, Department of Vaccinology and Applied Microbiology, Inhoffenstr. 7, 38124 Braunschweig, Germany

<sup>3</sup> Istituto di Ricerca in Biomedicina (IRB), Università della Svizzera italiana, Via Vincenzo Vela 6, 6500 Bellinzona, Switzerland

<sup>4</sup> YUMAB GmbH, Inhoffenstr. 7, 38124 Braunschweig, Germany

<sup>5</sup> Technische Universität Braunschweig, Institut für Genetik, Spielmannstr. 7, 38106 Braunschweig, Germany

<sup>6</sup> BioCopy GmbH, Elzstrasse 27, 79312 Emmendingen; Germany

<sup>7</sup> Helmholtz Centre for Infection Research, Research Group Innate Immunity and Infection, Inhoffenstr. 7, 38124 Braunschweig, Germany

<sup>8</sup> Westfälische Wilhelms-Universität Münster, Institut für Virologie (IVM), Von-Esmarch-Strasse 56, 48149 Münster, Germany

<sup>9</sup> Centre for Individualised Infection Medicine (CIIM), a joint venture of Helmholtz Centre for Infection Research and Medical School Hannover

\* shared first authors

# shared last authors

Corresponding author for antibody generation:

Michael Hust

Technische Universität Braunschweig

Institut für Biochemie, Biotechnologie und Bioinformatik

Abteilung Biotechnologie

Spielmannstr. 7

38106 Braunschweig, Germany

email: [m.hust@tu-bs.de](mailto:m.hust@tu-bs.de)

Corresponding author for antigen production:

Maren Schubert

Technische Universität Braunschweig

Institut für Biochemie, Biotechnologie und Bioinformatik

Abteilung Biotechnologie

Spielmannstr. 7

38106 Braunschweig, Germany

email: [maren.schubert@tu-bs.de](mailto:maren.schubert@tu-bs.de)

Corresponding author for virus neutralization:

Luka Ćicin-Šain

Helmholtz-Zentrum für Infektionsforschung GmbH

Abteilung Immunalterung und Chronische Infektionen

Inhoffenstr. 7

38124 Braunschweig, Germany

email: [Luka.Cicin-Sain@helmholtz-hzi.de](mailto:Luka.Cicin-Sain@helmholtz-hzi.de)

Corresponding author for docking studies:

Luca Varani

Istituto di Ricerca in Biomedicina (IRB)

Universita' della Svizzera italiana

Via Vincenzo Vela 6

6500 Bellinzona, Switzerland

email: [luca.varani@irb.usi.ch](mailto:luca.varani@irb.usi.ch)

Corresponding author for epitope mapping:

Günter Roth

BioCopy GmbH

Elzstrasse 27

79312 Emmendingen, Germany

email: [guenter.roth@biocopy.de](mailto:guenter.roth@biocopy.de)

## Abstract

COVID-19 is a severe acute respiratory disease caused by SARS-CoV-2, a novel betacoronavirus discovered in December 2019 and closely related to the SARS coronavirus (CoV). Both viruses use the human ACE2 receptor for cell entry, recognizing it with the Receptor Binding Domain (RBD) of the S1 subunit of the viral spike (S) protein. The S2 domain mediates viral fusion with the host cell membrane. Experience with SARS and MERS coronavirus has shown that potent monoclonal neutralizing antibodies against the RBD can inhibit the interaction with the virus cellular receptor (ACE2 for SARS) and block the virus cell entry. Assuming that a similar strategy would be successful against SARS-CoV-2, we used phage display to select from the human naïve universal antibody gene libraries HAL9/10 anti SARS2 spike antibodies capable of inhibiting interaction with ACE2. 309 unique fully human antibodies against S1 were identified. 17 showed more than 75% inhibition of spike binding to cells expressing ACE2, assessed by flow cytometry and several antibodies showed even an 50% inhibition at a molar ratio of the antibody to spike protein or RBD of 1:1. Furthermore, these antibodies neutralized active SARS-Cov-2 virus infection of VeroE6 cells. All 17 were all able to bind the isolated RBD, four of them with sub-nanomolar EC50. Epitope analysis of the antibodies revealed that six bind at the RBD-ACE2 interface and two on the opposite side of the domain. Universal libraries from healthy donors offer the advantage that antibodies can be generated quickly and independent from the availability of material from recovered patients in a pandemic situation.

## Main text

In 2015 Menachery et al. wrote: “Our work suggests a potential risk of SARS-CoV re-emergence from viruses currently circulating in bat populations.”<sup>1</sup> Four years later, a novel coronavirus causing a severe pneumonia was discovered and later named SARS-CoV-2. The outbreak started on a sea food market in Wuhan, Hubei province (China) at the end of 2019. The disease was named COVID-19 (coronavirus disease 2019) by the World Health Organization (WHO). Sequencing showed high identity to bat corona viruses (CoV, in particular RaTG13), beta-CoV virus causing human diseases like SARS and MERS and, to a lesser extent, the seasonal CoV hCoV-OC43 and HCov-HKU1<sup>2,3</sup>. The spike (S) protein of SARS-CoV-2, as well as SARS-CoV, binds to the human zinc peptidase angiotensin-converting enzyme 2 (ACE2) which is expressed on lung cells, heart, kidney and intestine cells and acts as receptor for virus entry. S protein consists of the N-terminal S1 subunit, which includes the receptor binding domain (RBD), and the C-terminal S2 subunit which is anchored to the viral membrane and is required for trimerization and fusion of the virus and host membrane<sup>4-6</sup>. The membrane bound host protease TMPRSS2 is responsible for S protein priming by cleavage of specific sites between S1 and S2. In addition to proteolytic activation of the S2' site, conformational changes and viral entry<sup>7-10</sup>.

Antibodies against the spike protein of corona viruses are potential candidates for therapeutic development<sup>11</sup>. Antibodies against the S1 subunit, especially against RBD, can potently neutralize SARS-CoV and MERS<sup>12-14</sup>. Monoclonal human antibodies against SARS-CoV were also described to cross-react with SARS-CoV-2, some of them were able to neutralize SARS-CoV-2<sup>15,16</sup>. In other approaches monoclonal antibodies against SARS-CoV-2 were selected by rescreening memory B-cells from a SARS patient<sup>17</sup>, selected from COVID-19 patients by single B-cell PCR<sup>18,19</sup> or using phage display<sup>20,21</sup>. Human recombinant antibodies were successfully used for the treatment of other viral diseases. The antibody mAb114<sup>22</sup> and the three antibody cocktail REGN-EB3<sup>23</sup> showed a good efficiency in clinical trials against Ebola virus<sup>24</sup>. The antibody palivizumab is EMA/FDA approved for treatment of a severe respiratory infection of infants caused by the respiratory syncytial virus (RSV)<sup>25,26</sup> and could be used as a guideline to develop therapeutic antibodies against SARS-CoV-2.

Antibody phage display is a powerful tool to generate human antibodies against infectious diseases<sup>27</sup>. We successfully used this technology to develop *in vivo* protective antibodies

against Venezuelan encephalitis virus <sup>28</sup>, Western-equine encephalitis <sup>29,30</sup>, Marburg virus <sup>31</sup> and Ebola Sudan virus <sup>32</sup>. In this work, we generated human recombinant antibodies against the spike proteins of SARS-CoV-2 from a universal, human naive antibody gene library. The selected antibodies inhibited the binding of the spike protein to ACE2 expressing cells and blocked SARS-CoV-2 infection of VeroE6 cells. These antibodies are potential candidates for the clinical development of passive immunotherapy for therapeutic and prophylactic purposes.

## Results

### *SARS CoV2 spike domains or subunits and human ACE2 were produced in insect cells and mammalian cells*

SARS-CoV-2 RBD-SD1 (aa319-591) according to Wrapp et al. 2020<sup>33</sup>, S1 subunit (aa14-694), S1-S2 (aa14-1210, with proline substitutions at position 986 and 987 and “GSAS” substitution at the furin site) and extracellular ACE2 were produced in insect cells using a plasmid based baculovirus free system<sup>34</sup> as well as in Expi293F cells. All antigens with exception of S1-S2 were produced with human IgG1 Fc part, murine IgG2a Fc part or with 6xHis tag in both expression systems. S1-S2 was only produced with 6xHis tag. The extracellular domain of ACE2 was produced with human IgG1 Fc part or mouse IgG2a in Expi293F cells and 6xHis tagged in insect cells. The yields of all produced proteins are given in Table 1. The proteins were analyzed by size exclusion chromatography (SEC) (Supplementary Data 1).

S1 as well as S1-S2 were more efficiently produced in insect cells compared to Expi293F cells. RBD was produced well in both production systems. The binding of the produced spike domains/proteins to ACE2 was validated by ELISA and flow cytometry analysis on ACE2 positive cells (Table 1).

### *Antibodies were selected by phage display*

Antibodies were selected against SARS-CoV-2 spike S1 subunit in four panning rounds in microtiter plates. The following single clone screening was performed by antigen ELISA in 96 well MTPs, using soluble monoclonal scFv produced in *E. coli*. Subsequently, DNA encoding the binders was sequenced and unique antibodies were recloned as scFv-Fc fusions.

In detail, three panning strategies were compared. In a first approach (STE70) the lambda (HAL9) and kappa (HAL10) libraries were combined and the antigen S1-hFc (with furin site, produced in High Five cells) was immobilized in PBS. Here, only seven unique antibodies were identified. In a second approach, the selection was performed separately for HAL10 (STE72) and HAL9 (STE73) using S1-hFc as antigen (without furin site, SEC purified, immobilized in carbonate buffer). Here, 90 unique antibodies were selected from HAL10 and 210 from HAL9. In a third approach (STE77 and STE78), S1-hFc produced in Expi293F cells was used (immobilized in carbonate buffer). Here, the panning resulted in

only three unique antibodies that were not further analyzed in inhibition assays. An overview is given in Table 2.

The antibody subfamily distribution was analyzed and compared to the subfamily distribution in the HAL9/10 library and *in vivo* (Fig. 1). The phage display selected antibodies mostly originated from the main gene families VH1 and VH3. Only few antibodies were found using VH4. In 96 of the 309 selected antibodies (31%), the V-gene VH3-23 was used. The V-gene distribution in the lambda light chains was similar to the distribution in the original library. Only antibodies comprising the V-gene VL6-57 were selected from the lambda library HAL10. In antibodies selected from the kappa library, VK2 and VK4 were underrepresented.

#### *Anti-SARS-CoV-2 scFv-Fc were produced transiently in mammalian cells*

In the interest of rapid throughput to quickly address the growing impact of the COVID-19 pandemic, only a selection of the unique antibodies was chosen for production as scFv-Fc and characterization. Antibodies with potential glycosylation sites in the CDRs, identified by *in silico* analysis, were excluded. A total of 109 scFv-Fc antibodies were produced in 5 mL culture scale, with yields ranging from of 20 to 440 mg/L.

#### *Antibodies inhibit the binding of spike to ACE2 positive cells*

To further select potential therapeutic candidates, an inhibition assay was established using flow cytometry of ACE2-positive cells, measuring competition of S1-S2 trimer binding by scFv-Fc antibodies. The entire spike protein ectodomain was used for this inhibition assay for optimal representation of the viral binding. In a first screening, the 110 antibodies were tested at 1500 nM (molar ratio antibody:S1-S2 30:1). 17 antibodies with inhibition better than 75% were selected for further analysis (Fig. 2A, Table 3 and Supplementary Data 2).

To further characterize these 17 antibodies, their inhibition of ACE2 binding was assessed at concentrations from 1500 nM to 4.7 nM (from 30:1 to ~1:10 Ab:antigen molar ratio) with the same flow cytometry assay (Fig. 2B and Table 3). Antibodies STE72-8E1 and STE73-2E9 showed 50% inhibition of ACE2 binding at a molar ratio of 0.8 antigen binding sites per spike monomer. For further validation, we performed the same assay using a RBD-mFc construct (Fig. 2C). With the exception of two antibodies (STE72-1G5 and STE73-6B10) all antibodies showed high inhibition of binding with molar ratios of 0.3-0.6:1 for STE72-4E12, STE72-8A2, STE72-8A6, STE73-2B2, STE73-2G8 and STE73-9G3.



The inhibition of the 17 antibodies was further validated on human Calu-3 cells, which naturally express ACE2<sup>9</sup> using RBD-mFc (Supplementary Data 3A) and S1-S2-His (Supplementary Data 3B) showing a stronger inhibition on Calu-3 compared to the transiently overexpressing ACE2 positive Expi293F cells. The Expi293F system allowed an improved estimation of inhibition potency when using the complete S1-S2 spike protein, because the S1-S2 was directly labeled with a fluorophore and the signals were not amplified in comparison to RBD with a murine Fc and a secondary fluorophore labeled antibody. Further, ACE2-expressing Expi293F cells present a much higher amount of ACE2-receptor on their surface compared to Calu-3, due to the CMV-mediated expression (data not shown). Taken together these data show that all 17 inhibiting antibodies selected against S1 interfered with RBD-ACE2 binding.

#### *Determination of EC50 of the inhibiting antibodies to RBD, S1 and S1-S2*

The EC50 of the inhibiting antibodies on RBD, S1 and S1-S2 spike was measured by ELISA. All inhibiting antibodies bound the isolated RBD (Fig. 3), identifying it as their target on the viral surface. The three best inhibiting antibodies STE73-2G8, STE73-2B2 and STE73-2E9 showed a half maximal binding in the subnanomolar range for RBD. While STE72-2G4 showed sub-nanomolar EC50 values for RBD and S1, it was discarded due to noticeable cross-reactivity to mFc. The EC50 on the S1-S2 spike trimer was reduced for most of the antibodies, in comparison to the isolated RBD or S1.

#### *Antibody combinations show synergistic effects in inhibition assays*

Combinations of best-neutralizing antibodies were tested in the flow cytometry inhibition assay using 1500 nM antibody and 50 nM spike (Fig. 4). Some of the combinations showed a significant increase of inhibition compared to the same amount of individual antibodies.

#### *Most, but not all, the inhibiting antibodies occupy the ACE2-binding region of the RBD*

To investigate the mechanism of action of the antibodies inhibiting the RBD-ACE2 interaction we first confirmed the binding of the antibodies to the RBD domain via label-free single color reflectometry<sup>35</sup>, followed by peptide epitope mapping to determine their binding sites. 15mer peptides covering the entire S protein sequence were immobilized in a microarray and binding of the antibodies to each peptide was evaluated. All antibodies which showed significant binding on the peptide array had epitopes allocated in the RBD

domain (Supplementary Data 4). We then used this information to guide and validate computational docking simulations followed by atomistic molecular dynamics simulations according to protocols developed and well established in our group <sup>36</sup>, obtaining three-dimensional atomic models of the antibody-RBD interaction for seven of the eight antibodies. Of the seven antibodies, five occupy the RBD region known to interact with ACE2 (Fig. 5), directly inhibiting its binding. Clear clashes between ACE2 and the antibodies are detected when superimposing the antibody-RBD structures to the ACE2-RBD complex. Interestingly, 2 antibodies (STE73-2C2 and STE73-2G8) bind to the opposite side of the RBD (Fig. 5). Their inhibition of ACE2 binding likely arises from allosteric inhibition, either through conformational effects or by preventing the RBD from adopting the open conformation, supposedly required for ACE2 binding, on the spike trimer. The binding of the seven antibodies to the spike ectodomain is shown in Supplementary Data 5.

#### *Anti-RBD antibodies neutralize active SARS-CoV-2*

All 17 inhibiting antibodies were screened in a cytopathic effect (CPE)-based neutralization assay using 250 pfu/well SARS-CoV-2 Münster/FI110320/1/2020 and 1 µg/mL (~10 nM) scFv-Fc (Fig. 6A, Table 3). VeroE6 cells showed pronounced CPE characterised by rounding and detachment clearly visible in phase contrast microscopy upon SARS-CoV-2 infection within 4 days, while uninfected cells maintained an undisturbed confluent monolayer. Virus inoculum pre-incubated with anti-RBD antibodies led to decreased CPE in varying degrees quantified by automated image analysis for cell confluence. All 17 antibodies showed neutralization in this assay. Fig. 6B shows examples for strong (STE73-6C8) and weak (STE73-2C2) neutralizing antibodies and controls.

## Discussion

For 130 years, antibodies in animal sera or convalescent human plasma were successfully used for the treatment of infectious diseases, starting with the work of Emil von Behring und Shibasaburo Kitasato against diphtheria <sup>37</sup>. However, the efficacy of human plasma derived from convalescent donors depends on the viral pathogen. In case of Ebola, no significant improved survival in comparison to the control group after treatment with convalescent human plasma was observed <sup>38</sup>. On the other hand, reduced mortality and safety was shown for convalescent plasma transfer in case of influenza A H1N1 in 2009 <sup>39,40</sup>. This approach was also used successfully for SARS <sup>41,42</sup>. It was also used for a very limited number of patients without significant results for MERS <sup>43</sup>. The approach was also used for COVID-19 with promising results <sup>44</sup>. The mode of action of these polyclonal antibody preparations can be virus neutralization, Fcγ receptor binding mediated phagocytosis or antibody dependent cellular cytotoxicity as well as complement activation <sup>45,46</sup>. In any serum therapy, the composition and efficacy of convalescent plasma is expected to differ from donor to donor, as well as batch to batch, and serum always has to be carefully controlled for viral contaminations (e.g. HIV, Hepatitis viruses) and neutralization potency. A convalescent patient can provide 400-800 mL plasma, with 250-300 mL of plasma typically needed per treatment. With two rounds of treatment per patient, this is a grave limitation since one donor can only provide material for 1-2 patients <sup>44,45</sup>. Human or humanized monoclonal antibodies are a powerful alternative to polyclonal antibodies derived from convalescent plasma. Following this approach, the humanized antibody Palivizumab was approved in 2009 for treatment and prevention of Respiratory Syncytial Virus (RSV) infections <sup>47</sup>. Other antibodies against viral diseases successfully tested in clinical studies are mAb114 and REGN-EB3 against Ebola disease <sup>24</sup>.

In this work, we generated monoclonal human antibodies capable of neutralizing SARS-CoV-2 using a universal, naive antibody gene library generated from healthy donors. This allowed selection of human antibodies against this virus without the necessity to obtain material from COVID-19 infected individuals. Phage display derived antibodies are well established medications; twelve such antibodies are approved by EMA/FDA at the time of writing, a significant increase compared to the six such antibodies approved in 2016 <sup>48</sup>.

We selected antibodies that can block the interaction of the viral spike protein with its human cellular receptor ACE2, since antibodies preventing ACE2 binding were shown to potently neutralize the closely related SARS1 virus. 309 unique fully human monoclonal antibodies were generated using different panning strategies. The S1 subunit produced in

insect cells was better suited for antibody selection than the S1 subunit produced in mammalian cells. The V-gene distribution of the selected anti-Spike antibodies is largely in accordance with the V-gene subfamily distribution shown by Kügler et al <sup>48</sup>. As the human receptor of SARS-CoV and SARS-CoV-2 is ACE2 <sup>3</sup>, we focused on antibodies which block the interaction of the spike protein with this receptor. Using different panning strategies, 309 unique fully human monoclonal antibodies were generated. The S1 subunit produced in insect cells was better suited for antibody generation than the S1 subunit produced in mammalian cells. The V-gene distribution of the selected anti-S1 antibodies is largely in accordance with the V-gene subfamily distribution shown by Kügler et al <sup>49</sup> for antibodies selected against 121 other antigens from HAL9/10. Only the VH1 subfamily was over-represented and VH4 and Vkappa4 subfamilies were rarely selected despite their presence in the HAL libraries. The most frequently used V-gene was VH3-30. Interestingly, an increased use of this V-gene in anti-SARS-CoV-2 antibodies was also described by Robbiani *et al.* 2020 <sup>50</sup> for anti-RBD B-cells selected from COVID-19 patients. By contrast, the second most selected V-gene was VH3-53, which was selected in our approach only once. Robbiani *et al.* also described an overrepresented use of VL6-57, as found in our antibodies as well. However, it has to be noted that VL6 is overrepresented in our naïve library compared to its *in vivo* occurrence.

From the initial 309 antibodies, 109 were recloned in the scFv-Fc IgG-like bivalent format. Their ability to inhibit binding of fluorescently labelled S1-S2 trimer to ACE2 expressing cells was assessed by flow cytometry. The half-maximal inhibition of the best inhibiting 17 antibodies was measured both with the spike trimer and isolated RBD. Significantly, some of the antibodies showed half-maximal inhibition at a ratio around 1:1 - sometimes even better - when calculated per individual binding site (antigen binding site:spike monomer/RBD). A similar molar ratio of 1:1 was demonstrated by Miethe *et al.* 2014 for inhibition of botulinum toxin A <sup>51</sup>. In the trimeric spike protein, the RBD can be in an “up” (open) or “down” (close) position. The “down” conformation can not bind to ACE2, in contrast to the less stable “up” conformation <sup>33</sup>. The RBDs can be in different conformations on the same spike trimer, which offers a possible explanation for the observed effective antibody to spike molar ratio lower than 1:1. We observed that molar ratios for half maximal inhibition were lower for RBD compared to spike protein. For some antibodies, approximately 0.5 antigen binding sites were needed to achieve a 50% inhibition. The fact that the antibodies are more efficient at inhibiting RBD binding to ACE2 rather than S trimer binding can be explained with the higher affinity of the antibodies for

the isolated RBD compared to the trimeric spike, which in turn points to the presence of partially or completely inaccessible epitopes on the trimer, an occurrence seen in other viruses.

Inhibition of ACE2 binding was stronger on the human lung cells Calu-3, which better represent the *in vivo* situation than transiently ACE2 overexpressing cells. Nevertheless, the titration assays were initially performed with ACE2 overexpressing Expi293F cells because this allowed better quantitative assessment of inhibiting potency.

Antibody combinations can have a synergistic effect as previously described for toxins and viruses<sup>32,52–54</sup>. This approach may also avoid formation of viral escape mutants. Here, the best combinations showed a significantly improved inhibition efficacy, at least when using an excess of antibodies (Ab:Agmolar ratio 30:1).

Of the 17 inhibiting antibodies in titration ELISA, most antibodies showed stronger binding to RBD or S1 compared to S1-S2 spike. The reason could be a conformational change in RBD in the complete spike protein. This is similar to what was reported by Pinto *et al.*<sup>17</sup> who showed a lower affinity of the antibody S309.

Peptide mapping performed on 15mers spanning the entire spike protein showed part of the binding epitopes of seven inhibiting antibodies. Experimentally validated computational docking shows that five of them occupy the ACE2 binding site on the RBD, thus likely achieving direct inhibition of virus-ACE2 interaction. The binding sites of antibody BD368-2<sup>18</sup> and B38<sup>55</sup> also overlap with the RBD ACE2 binding interface. Interestingly, our antibody STE73-2G8 which has subnanomolar EC50 to RBD and potent inhibition and neutralization, binds to the N-terminal part of RBD, away from the ACE2 interface. This is the same region recognized by the SARS and SARS-CoV-2 cross-neutralizing antibody S309<sup>17</sup>. The combination of STE73-2G8 and STE73-6C8 directed against the RBD-ACE2 interface has strong inhibition of ACE2 binding, suggesting a promising approach for an antibody cocktail.

Finally, all of the 17 antibodies were tested in neutralization assays using SARS-CoV-2 and all antibodies showed a degree of neutralization in this assay. While this study did not aim to define the lowest effective concentration of individual antibodies in limiting dilution conditions, all tested antibodies showed a clear and measurable effect at a relatively low concentration. Therefore, our approach enabled a rapid selection of antiviral antibodies.

We conclude that the described antibodies are suitable candidates for the development of passive immunotherapy for the treatment of COVID-19. They could be used therapeutically, perhaps to prevent individuals from having to undergo intensive therapy,

but also prophylactically, to protect health workers or risk groups that do not respond to vaccination. Before clinical application, the risk of antibody-dependent enhancement of disease (ADE) has to be considered for COVID-19. In contrast to antibodies against Ebola where ADCC is important for protection <sup>22</sup>, antibodies directed against the spike protein of SARS-CoV-2 may lead to ADE <sup>56–58</sup>. SARS cause an acute lung injury which is also driven by immune dysregulation and inflammation caused by anti-spike antibodies <sup>59</sup>. While, Quinlan *et al.* <sup>60</sup> described that animals immunized with RBD SARS-CoV-2 did not mediate ADE and suggested for vaccines the use of RBD, some of our monoclonal antibodies lead to an increased binding of the spike protein to ACE2 positive cells, or to an increased infectivity. A possible explanation could be multimerization of the spike by antibody ‘cross-linking’ or the stabilization of an infection-promoting conformation by the antibodies. These aspects need to be carefully evaluated before human use of ours and other antibodies. For the further development of therapeutic antibodies, we suggest to focus on RBD and/or the use of silenced Fc parts with deleted Fcγ and C1q binding <sup>61–63</sup> for safety reasons.

## Methods

### *Design of expression vectors*

Production in Expi293F cells was performed using pCSE2.5-His-XP, pCSE2.6-hFc-XP or pCSE2.6-mFc-XP<sup>64</sup> where the respective single chain variable fragment of the antibodies or antigens were inserted by *NcoI/NotI* (NEB Biolabs) digestion. Antigen production in High Five insect cells was performed using *NcoI/NotI* compatible variants of the OpiE2 plasmid<sup>65</sup> containing an N-terminal signal peptide of the mouse Ig heavy chain, the respective antigen and C-terminal either 6xHis-tag, hFc or mFc.

### *Production of antigens in insect cells*

Different domains or subunits of the Spike protein (GenBank: MN908947) and the extracellular domain of ACE2 receptor (GenBank NM\_021804.3) were Baculovirus-free produced in High Five cells (Thermo Fisher Scientific) by transient transfection as previously described in Bleckmann *et al.*<sup>34</sup>. Briefly, High Five cells were cultivated at 27°C, 110 rpm in ExCell405 media (Sigma) and kept at a cell density between 0.3 – 5.5 x10<sup>6</sup> cells/mL. For transfection cells were centrifuged and resuspended in fresh media to a density of 4x10<sup>6</sup> cells/mL and transfected with 4 µg plasmid/mL and 16 µg/mL of PEI 40 kDa (Polysciences). 4 h up to 24 h after transfection cells were fed with 75% of the transfection volume. At 48 h after transfection cell culture medium was doubled. Cell supernatant was harvested five days after transfection in a two step centrifugation (4 min at 180xg and 20 min at above 3500xg) and 0.2 µm filtrated for purification.

### *Production of antigens and scFv-Fc in mammalian cells*

Antibodies, different domains or subunits of the Spike protein and the extracellular domain of ACE2 were produced in Expi293F cells (Thermo Fisher Scientific). Expi293F cells were cultured at 37°C, 110 rpm and 5% CO<sub>2</sub> in Gibco FreeStyle F17 expression media (Thermo Fisher Scientific) supplemented with 8 mM Glutamine and 0.1% Pluronic F68 (PAN Biotech). At the day of transfection cell density was between 1.5 - 2x10<sup>6</sup> cells/mL and viability at least above 90%. For formation of DNA:PEI complexes 1 µg DNA/mL transfection volume and 5 µg of 40 kDa PEI (Polysciences) were first diluted separately in 5% transfection volume in supplemented F17 media. DNA and PEI was then mixed and incubated ~25 min at RT before addition to the cells. 48 h later the culture volume was doubled by feeding HyClone SFM4Transfx-293 media (GE Healthcare) supplemented with

8 mM Glutamine. Additionally, HyClone Boost 6 supplement (GE Healthcare) was added with 10% of the end volume. One week after transfection supernatant was harvested by 15 min centrifugation at 1500xg.

### *Protein purification*

Protein purification was performed depending on the production scale in either 24 well filter plate with 0.5 mL resin (10 mL scale) or 1 mL column on Äkta go (GE Healthcare), Äkta Pure (GE Healthcare) or Profina System (BIO-RAD). MabSelect SuRe (GE Healthcare) was used as resin for Protein A purification. For His-tag purification of Expi293F supernatant HisTrap FF Crude column (GE Healthcare) and for His-tag purification of insect cell supernatant HisTrap excel column (GE Healthcare) was used. All purifications were performed according to the manufactures manual. Indicated antigens were further purified by size exclusion chromatography by a 16/600 Superdex 200 kDa pg (GE Healthcare). All antigens, antibodies and scFv-Fc were run on Superdex 200 Increase 10/300GL (GE Healthcare) on Äkta or HPLC (Techlab) on an AdvanceBio SEC 300Å 2.7 µm, 7.8x300 mm (Agilent) for quality control.

### *Validation of spike protein binding to ACE2*

ACE2 binding to the produced antigens was confirmed in ELISA (enzyme linked immunosorbent assay) and on cells in flow cytometry. For ELISA, 200 ng ACE2-mFc per well was immobilized on a Costar High binding 96 well plate (Corning, Costar) at 4°C overnight. Next, the wells were blocked with 350 µL 2% MBPST (2% (w/v) milk powder in PBS; 0.05% Tween20) for 1 h at RT and then washed 3 times with H<sub>2</sub>O and 0.05% Tween20 (BioTek Instruments, EL405). Afterwards, the respective antigen was added at the indicated concentrations and incubated 1 h at RT prior to another 3 times washing step. Finally, the antigen was detected using mouse-anti-polyHis conjugated with horseradish peroxidase (HRP) (1:20000, A7058, Sigma) for His-tagged antigens, goat-anti-mIgG(Fc) conjugated with HRP (1:42000, A0168, Sigma) for mFc tagged antigen versions or goat-anti-hlgG(Fc) conjugated with HRP (1:70000, A0170, Sigma) if hFc-tagged antigens had to be detected. Bound antigens were visualized with tetramethylbenzidine (TMB) substrate (20 parts TMB solution A (30 mM Potassium citrate; 1 % (w/v) Citric acid (pH 4.1)) and 1 part TMB solution B (10 mM TMB; 10% (v/v) Acetone; 90% (v/v) Ethanol; 80 mM H<sub>2</sub>O<sub>2</sub> (30%)) were mixed). After addition of 1 N H<sub>2</sub>SO<sub>4</sub> to stop the reaction, absorbance at



450 nm with a 620 nm reference wavelength was measured in an ELISA plate reader (BioTek Instruments, Epoch).

To verify the ACE2-antigen interaction on living cells, Expi293F cells were transfected according to the protocol above using pCSE2.5-ACE2<sub>fl</sub>-His and 5% eGFP plasmid. Two days after transfection, purified S1-S2-His, S1-His or RBD-His were labelled using Monolith NT™ His-Tag Labeling Kit RED-tris-NTA (Nanotemper) according to the manufacturer's protocol. Fc-tagged ligand versions were labelled indirectly by using goat-anti-mFc-APC (Dianova) or mouse anti-hFcγ-APC (Biolegend) antibody. 100, 50 and 25 nM of antigen were incubated with 5x10<sup>5</sup> ACE2-expressing or non-transfected Expi293F cells (negative control) 50 min on ice. After two washing steps, fluorescence was measured in MACSQuant Analyzer (Miltenyi Biotec.).

#### *Antibody selection using phage display*

The antibody selection was performed as described previously with modifications<sup>66</sup>. In brief, for panning procedure, the antigen was immobilized on a High binding 96 well plate (Corning, Costar). 5 µg of S1-hFc (produced in High Five cells) was diluted in carbonate puffer (50 mM NaHCO<sub>3</sub>/Na<sub>2</sub>CO<sub>3</sub>, pH 9.6) and coated onto the wells at 4°C overnight. Next, the wells were blocked with 350 µL 2% MBPST (2% (w/v) milk powder in PBS; 0.05% Tween20) for 1 h at RT and then washed 3 times with PBST (PBS; 0.05% Tween20). Before adding the libraries to the coated wells, the libraries (5x10<sup>10</sup> phage particles) were preincubated with 5 µg of an unrelated scFv-Fc and 2% MPBST on blocked wells for 1 h at RT, to deprive libraries of human Fc fragment binders. The libraries were transferred to the antigen-coated wells, incubated for 2 h at RT and washed 10 times. Bound phage were eluted with 150 µL trypsin (10 µg/mL) at 37°C, 30 minutes and used for the next panning round. The eluted phage solution was transferred to a 96 deep well plate (Greiner Bio-One, Frickenhausen, Germany) and incubated with 150 µL *E. coli* TG1 (OD<sub>600</sub> = 0.5) firstly for 30 min at 37°C, then 30 min at 37°C and 650 rpm to infect the phage particles. 1 mL 2xYT-GA (1.6% (w/v) Tryptone; 1 % (w/v) Yeast extract; 0.5% (w/v) NaCl (pH 7.0), 100 mM D-Glucose, 100 µg/mL ampicillin) was added and incubated for 1 h at 37°C and 650 rpm, followed by addition of 1x10<sup>10</sup> cfu M13KO7 helper phage. Subsequently, the infected bacteria were incubated for 30 min at 37°C followed by 30 min at 37°C and 650 rpm before centrifugation for 10 min at 3220xg. The supernatant was discarded and the pellet resuspended in fresh 2xYT-AK (1.6% (w/v) Tryptone; 1 % (w/v) Yeast extract; 0.5% (w/v) NaCl (pH 7.0), 100 µg/mL ampicillin, 50 µg/mL kanamycin). The antibody phage were

amplified overnight at 30°C and 650 rpm and used for the next panning round. In total four panning rounds were performed. In each round, the stringency of the washing procedure was increased (20x in panning round 2, 30x in panning round 3, 40x in panning round 4) and the amount of antigen was reduced (2.5 µg in panning round 2, 1.5 µg in panning round 3 and 1 µg in panning round 4). After the fourth as well as third panning round single clones containing plates were used to select monoclonal antibody clones for the screening ELISA.

#### *Screening of monoclonal recombinant binders using E. coli scFv supernatant*

Soluble antibody fragments (scFv) were produced in 96-well polypropylene MTPs (U96 PP, Greiner Bio-One) as described before<sup>54,66</sup>. Briefly, 150 µL 2xYT-GA was inoculated with the bacteria bearing scFv expressing phagemids. MTPs were incubated overnight at 37°C and 800 rpm in a MTP shaker (Thermoshaker PST-60HL-4, Lab4You, Berlin, Germany). A volume of 180 µL 2xYT-GA in a PP-MTP well was inoculated with 20 µL of the overnight culture and grown at 37°C and 800 rpm for 90 minutes (approx. OD<sub>600</sub> of 0.5). Bacteria were harvested by centrifugation for 10 min at 3220xg and the supernatant was discarded. To induce expression of the antibody genes, the pellets were resuspended in 200 µL 2xYT supplemented with 100 µg/mL ampicillin and 50 µM isopropyl-beta D thiogalactopyranoside (IPTG) and incubated at 30°C and 800 rpm overnight. Bacteria were pelleted by centrifugation for 20 min at 3220xg and 4°C.

For the ELISA, 100 ng of antigen was coated on 96 well microtiter plates (High binding, Greiner) in PBS (pH 7.4) overnight at 4°C. After coating, the wells were blocked with 2% MPBST for 1 h at RT, followed by three washing steps with H<sub>2</sub>O and 0.05% Tween20. Supernatants containing secreted monoclonal scFv were mixed with 2% MPBST (1:2) and incubated onto the antigen coated plates for 1 h at 37°C followed by three H<sub>2</sub>O and 0.05% Tween20 washing cycles. Bound scFv were detected using murine mAb 9E10 which recognizes the C-terminal c-myc tag (1:50 diluted in 2% MPBST) and a goat anti-mouse serum conjugated with horseradish peroxidase (HRP) (A0168, Sigma) (1:42000 dilution in 2% MPBST). Bound antibodies were visualized with tetramethylbenzidine (TMB) substrate (20 parts TMB solution A (30 mM Potassium citrate; 1% (w/v) Citric acid (pH 4.1)) and 1 part TMB solution B (10 mM TMB; 10% (v/v) Acetone; 90% (v/v) Ethanol; 80 mM H<sub>2</sub>O<sub>2</sub> (30%)) were mixed). After stopping the reaction by addition of 1 N H<sub>2</sub>SO<sub>4</sub>, absorbance at 450 nm with a 620 nm reference was measured in an ELISA plate reader (Epoch, BioTek).

Monoclonal binders were sequenced and analyzed using VBASE2 ([www.vbase2.org](http://www.vbase2.org))<sup>67</sup> and possible glycosylation positions in the CDRS were analyzed according to Lu et al<sup>68</sup>.

#### *Inhibition of S1-S2 binding to ACE2 expressing cells using MacsQuant*

The inhibition tests in cytometer on EXPI293F cells were performed based on the protocol for *validation of spike protein binding to ACE2* (see above) but only binding to S1-S2-His and RBD-mFc antigen (High Five cell produced) was analyzed. The assay was done in two setups. In the first setup 50 nM antigen was incubated with min. 1  $\mu$ M of different scFv-Fc and the ACE2 expressing cells. The resulting median antigen fluorescence of GFP positive living single cells was measured. For comparison of the different scFv-Fc first the median fluorescence background of cells without antigen was subtracted, second it was normalized to the antigen signal where no antibody was applied. All scFv-Fc showing an inhibition in this setup were further analyzed by titration (max. 1500 nM- 4.7 nM) on S1-S2-His (High Five cell produced), respectively on RBD-mFc (max. 100 nM-0.03 nM). The IC50 was calculated using the equation  $f(x)=A_{min}+(A_{max}-A_{min})/(1+(x/x_0)^h)^s$  and parameters from Origin. In addition, pairwise combinations (max. 750 nM of each scFv-Fc) of the different inhibiting scFv-Fc were tested.

#### *Dose dependent binding of the scFv-Fc in titration ELISA*

ELISA were essentially performed as described above in “*Screening of monoclonal recombinant binders using E.coli scFv supernatant*”. For titration ELISA the purified scFv-hFc were titrated from 10  $\mu$ g/mL- 0.001  $\mu$ g/mL on 30ng/well of the following antigens: S1-S2-His (High Five cell produced), RBD-mFc (High Five cell produced), S1-mFc (High Five cell produced) and TUN219-2C1-mFc (as control for unspecific Fc binding). In addition, all scFv-hFc were also tested only at the highest concentration (10 $\mu$ g/mL) for unspecific cross-reactivity on Expi293F cell lysate (10<sup>4</sup>cells/well), BSA (1% w/v) and lysozyme. ScFv-hFc were detected using goat-anti-hIgG(Fc)-HRP (1:70000, A0170, Sigma). Titration assays were performed using 384 well microtiter plates (Costar) using Precision XS microplate sample processor (BioTek), EL406 washer dispenser (BioTek) and BioStack Microplate stacker (BioTek). EC50 were calculated with by GraphPad Prism Version 6.1, fitting to a four-parameter logistic curve.

## *Epitope mapping*

Single color reflectometry (SCORE) and epitope mapping were performed by BioCopy GmbH, Germany. Array design covered the S- and N-proteins of different corona viruses including SARS-CoV-2, SARS-CoV-1, NL63, 229E, HKU1, and OC43 as well as different control spots (e.g HA-tag). A single array contained a total of 3025 spots (55 rows x 55 columns) of 15 aa long peptides with 11 aa overlap between each peptide. The arrays were manufactured via lithographic synthesis by Schafer-N, Denmark. All microarray slides were blocked in 10 ml 1x PBS (pH 7.4) with 5 mg/ml BSA (Albumin Fraction V) (8076.4, Carl Roth) and 0.1% SuperBlock (37515, Thermo Fisher Scientific) for 30 min on a tube roller at RT. Thereafter, a BScreen device (former Biometrics, Tübingen, now BioCopy, Emmendingen) with its microfluidic flowcell was used for the incubation steps of the different antibodies to the peptide arrays. Every antibody was separately flushed over the peptide array followed by a secondary labelling antibody. After every incubation cycle, the arrays were scanned in a GenePix 4000B (Molecular Devices, USA) with a PMT of 600 for both fluorescent channels and a resolution of 5  $\mu\text{m}$ .

The following microfluidic assay was performed for the different incubation steps: (1) Baseline with running buffer for about 200 s at a speed of 3  $\mu\text{l/s}$  and a total volume of 600  $\mu\text{l}$ . (2) Association of antibodies (find order below) for 330 s at a speed of 3  $\mu\text{l/s}$  and a total volume of 990  $\mu\text{l}$ . (3) Dissociation step with running buffer for 100 s at a speed of 3  $\mu\text{l/s}$  and a total volume of 300  $\mu\text{l}$ . (4) Endline step with running buffer for 100 s at a speed of 3  $\mu\text{l/s}$  and a total volume of 300  $\mu\text{l}$ . (5) Baseline with running buffer for about 200 s at a speed of 3  $\mu\text{l/s}$  and a total volume of 600  $\mu\text{l}$ . (6) Association of anti-Human IgG Alexa 546 (A-21089, Thermo Fisher Scientific) (4.95  $\mu\text{g/ml}$  diluted in 1x PBS (pH 7.4) + 5 mg/ml BSA (Albumin Fraction V) (8076.4, Carl Roth) + 1% SuperBlock (37515, Thermo Fisher Scientific)) for 330 s at a speed of 3  $\mu\text{l/s}$  and a total volume of 990  $\mu\text{l}$ . (7) Dissociation step with running buffer for 100 s at a speed of 3  $\mu\text{l/s}$  and a total volume of 300  $\mu\text{l}$ . (8) Endline step with running buffer for 100 s at a speed of 3  $\mu\text{l/s}$  and a total volume of 300  $\mu\text{l}$ .

Reagent order of slide 1: (1) STE72-8-A6 (14.85  $\mu\text{g/ml}$ ), (2) STE73-6-C8 (8.02  $\mu\text{g/ml}$ ), (3) STE73-6-C1 (14.85  $\mu\text{g/ml}$ ), (4) STE72-8-A2 (14.85  $\mu\text{g/ml}$ ), (5) STE73-2-G8 (14.85  $\mu\text{g/ml}$ ), (6) STE73-2-C2 (14.85  $\mu\text{g/ml}$ ), (7) STE73-2-E9 (14.85  $\mu\text{g/ml}$ ), (8) STE72-8-E1 (14.85  $\mu\text{g/ml}$ ), (9) STE73-9-G3 (14.85  $\mu\text{g/ml}$ ), (10) STE73-2-B2 (14.85  $\mu\text{g/ml}$ ), (11) STE73-6B10 (14.85  $\mu\text{g/ml}$ ), (12) STE72-1G5 (14.85  $\mu\text{g/ml}$ ), (13) STE72-1B6 (14.85  $\mu\text{g/ml}$ ), (14) STE72-4C10 (14.85  $\mu\text{g/ml}$ ), (15) STE72-4E12 (14.85  $\mu\text{g/ml}$ ), (16) STE72-2G4 (14.85  $\mu\text{g/ml}$ )

Reagent order of slide 2: (1) STE73-6-C8 (14.85 µg/ml), (2) STE72-8-A6 (14.85 µg/ml), (3) STE73-6-C1 (14.85 µg/ml), (4) STE72-8-A2 (14.85 µg/ml), (5) STE73-2-C2 (14.85 µg/ml), (6) STE73-2-G8 (14.85 µg/ml), (7) STE73-2-E9 (14.85 µg/ml), (8) STE73-9-G3 (14.85 µg/ml), (9) STE72-8-E1 (14.85 µg/ml), (10) STE73-2-B2 (14.85 µg/ml), (11) STE72-1G5 (14.85 µg/ml), (12) STE73-6B10 (14.85 µg/ml), (13) STE72-4C10 (14.85 µg/ml), (14) STE72-1B6 (14.85 µg/ml), (15) STE72-2G4 (14.85 µg/ml), (16) STE72-4E12 (14.85 µg/ml)  
The used running buffer consisted of 1x PBS (pH 7.4) + 5 mg/ml BSA (Albumin Fraction V) (8076.4, Carl Roth) + 0.1% SuperBlock (37515, Thermo Fisher Scientific). All antibodies were diluted in 1x PBS (pH 7.4) + 5 mg/ml BSA (Albumin Fraction V) (8076.4, Carl Roth) + 1% SuperBlock (37515, Thermo Fisher Scientific) with a final volume of 1010 µl.

The fluorescence data were saved as tif-files, analyzed and measured using ImageJ, 2.0.0. A 55x55 grid was applied to the image and the average total grey value per spot was calculated to a relative fluorescence corresponding 100% laser power and PTM 600 setting.

For each spot and each binding step the signal was calculated as difference of signal after vs. before binding, normalized to the total fluorescence generated of the array. This resulted in a ranking of 3025 interactions. All interactions lower as the controls (e.g. HA-tag) are considered as background. Hits against the S protein sequence of Sars-Cov2 were considered as antibody epitopes if they met the criteria of being among the 20 strongest microarray signals and had a signal to background ratio of at least 3 or higher.

#### *Antibody structures and computational docking studies*

The antibody structures were modelled according to the canonical structure method using the RosettaAntibody program <sup>69</sup> as previously described <sup>70</sup> and docked to the experimental structure of SARS-CoV-2 S protein receptor binding domain (RBD, PDBid: 6M17) <sup>6</sup>.

Docking was performed using the RosettaDock 3.12 software <sup>71</sup> as previously described <sup>72</sup>. Briefly, each antibody was manually placed with the CDR loops facing the RBD region containing the residues identified by the peptide mapping experiment. The two partners were moved away from each other by 25Å and then brought together by the computational docking algorithm, obtaining thousands of computationally generated complexes (typically 15,000). The antibody/RBD complexes were structurally clustered and then selected according to the scoring function (an estimate of energetically favourable solutions) and agreement with the peptide mapping data. Selected complexes were further optimized by a docking refinement step and molecular dynamics simulations.

### *Screening monoclonal antibodies for SARS-CoV-2 neutralization in cell culture*

VeroE6 cells (ATCC CRL-1586) were seeded at a density of  $6 \times 10^4$ /well onto cell culture 96-well plates (Nunc, Cat.#167008). Two days later, cells reached 100% confluence. For neutralization, antibodies (1  $\mu\text{g/ml}$  final concentration) were mixed with the virus inoculum (250 pfu/well), using strain SARS-CoV-2/Münster/FI110320/1/2020 (kind gift of Stephan Ludwig, University of Münster, Germany), in 100  $\mu\text{l}$  full VeroE6 culture medium (DMEM, 10% FCS, 2 mM glutamine, penicillin, streptomycin) in technical quadruplicates or sixfold replicates and incubated for 1 hour at 37°C. Then, cells were overlaid with the antibody/virus mix and phase contrast images were taken automatically using a Sartorius IncuCyte S3 (10x objective, two hours image intervals, 4 images per well) housed in a HeraCell 150i incubator (37°C, 100% humidity, 5% CO<sub>2</sub>). Image data was quantified with the IncuCyte S3 GUI tools measuring the decrease of confluence concomitant with the cytopathic effect of the virus in relation to uninfected controls and controls without antibody and analyzed with GraphPad Prism 8. Given is the median of the inhibition.

## **Acknowledgements**

We kindly acknowledge the support of the European Union for the ATAC (“antibody therapy against corona”, Horizon2020 number 101003650) consortium and the MWK Niedersachsen (14-76103-184 CORONA-2/20). L. Varani gratefully acknowledges support from SNF and Lions Club Monteceneri. Work was also supported by the Deutsche Forschungsgemeinschaft (DFG), grant KFO342 to L. Brunotte and S. Ludwig. We would like to highlight the passion and motivation of the complete team working on this topic in this special time. We are deeply grateful to Adelheid Langner, Andrea Walzog, Bettina Sandner, Cornelia Oltmann and Wolfgang Grassl for constant help and support.

## **Author contributions**

F.B., Gü.R., S.D., L.V., L.Ĉ-Ŝ., M.S., M.H. conceptualized the study. F.B., D.M., N.L., S.S., U.R., L.S., P.A.H., R.B., M.R., K-T.S., K.D.R.R., P.R., K.E., Y.K., D.S., M.P., S.Z.E., J.W., M.B., M.G., S.D.K., Gü.R., M.S. performed and designed experiments. F.B., D.M. N.L., S.S., U.R., L.S., P.K., Gü.R., L.V., L.Ĉ-Ŝ., M.S., M.H. analyzed data. S.L., L.B. provided material. S.D., L.V., L.Ĉ-Ŝ., M.H. conceived the funding. P.K., E.V.W., Gi.R., A.K., V.F., S.D., M.S. advised on experimental design and data analysis. F.B., S.D., Gü.R., L.V., L.Ĉ-Ŝ., M.S., M.H. wrote the manuscript.

## **Competing interests**

The authors declare a conflict of interest. The authors F.B., D.M., N.L., S.S., P.A.H., R.B., M.R., K.T.S., K.D.R.P., S.Z.E., M.B., E.V.W., Gi.R., V.F., S.T., M.S. and M.H. submitted a patent application on blocking antibodies against SARS-CoV-2.

## References

1. Menachery, V. D. *et al.* A SARS-like cluster of circulating bat coronaviruses shows potential for human emergence. *Nat. Med.* **21**, 1508–1513 (2015).
2. Lu, R. *et al.* Genomic characterisation and epidemiology of 2019 novel coronavirus: implications for virus origins and receptor binding. *Lancet* **395**, 565–574 (2020).
3. Zhou, P. *et al.* A pneumonia outbreak associated with a new coronavirus of probable bat origin. *Nature* **579**, 270–273 (2020).
4. Walls, A. C. *et al.* Structure, Function, and Antigenicity of the SARS-CoV-2 Spike Glycoprotein. *Cell* (2020) doi:10.1016/j.cell.2020.02.058.
5. Wang, Q. *et al.* Structural and Functional Basis of SARS-CoV-2 Entry by Using Human ACE2. *Cell* (2020) doi:10.1016/j.cell.2020.03.045.
6. Yan, R. *et al.* Structural basis for the recognition of SARS-CoV-2 by full-length human ACE2. *Science* **367**, 1444–1448 (2020).
7. Burkard, C. *et al.* Coronavirus cell entry occurs through the endo-/lysosomal pathway in a proteolysis-dependent manner. *PLoS Pathog.* **10**, e1004502 (2014).
8. Coutard, B. *et al.* The spike glycoprotein of the new coronavirus 2019-nCoV contains a furin-like cleavage site absent in CoV of the same clade. *Antiviral Res.* **176**, 104742 (2020).
9. Hoffmann, M. *et al.* SARS-CoV-2 Cell Entry Depends on ACE2 and TMPRSS2 and Is Blocked by a Clinically Proven Protease Inhibitor. *Cell* **181**, 271-280.e8 (2020).
10. Li, F. Structure, Function, and Evolution of Coronavirus Spike Proteins. *Annu Rev Virol* **3**, 237–261 (2016).
11. Zhou, G. & Zhao, Q. Perspectives on therapeutic neutralizing antibodies against the Novel Coronavirus SARS-CoV-2. *Int. J. Biol. Sci.* **16**, 1718–1723 (2020).
12. Coughlin, M. M. & Prabhakar, B. S. Neutralizing human monoclonal antibodies to severe acute respiratory syndrome coronavirus: target, mechanism of action, and therapeutic potential. *Rev. Med. Virol.* **22**, 2–17 (2012).
13. Widjaja, I. *et al.* Towards a solution to MERS: protective human monoclonal antibodies targeting different domains and functions of the MERS-coronavirus spike glycoprotein. *Emerg Microbes Infect* **8**, 516–530 (2019).
14. Zhu, Z. *et al.* Potent cross-reactive neutralization of SARS coronavirus isolates by human monoclonal antibodies. *Proc. Natl. Acad. Sci. U.S.A.* **104**, 12123–12128 (2007).



15. Tian, X. *et al.* Potent binding of 2019 novel coronavirus spike protein by a SARS coronavirus-specific human monoclonal antibody. *Emerg Microbes Infect* **9**, 382–385 (2020).
16. Wang, C. *et al.* A human monoclonal antibody blocking SARS-CoV-2 infection. *Nat Commun* **11**, 2251 (2020).
17. Pinto, D. *et al.* Cross-neutralization of SARS-CoV-2 by a human monoclonal SARS-CoV antibody. *Nature* (2020) doi:10.1038/s41586-020-2349-y.
18. Cao, Y. *et al.* Potent neutralizing antibodies against SARS-CoV-2 identified by high-throughput single-cell sequencing of convalescent patients' B cells. *Cell* (2020) doi:10.1016/j.cell.2020.05.025.
19. Shi, R. *et al.* A human neutralizing antibody targets the receptor binding site of SARS-CoV-2. *Nature* (2020) doi:10.1038/s41586-020-2381-y.
20. Liu, X. *et al.* Neutralizing Antibodies Isolated by a site-directed Screening have Potent Protection on SARS-CoV-2 Infection. *bioRxiv* 2020.05.03.074914 (2020) doi:10.1101/2020.05.03.074914.
21. Zeng, X. *et al.* Blocking antibodies against SARS-CoV-2 RBD isolated from a phage display antibody library using a competitive biopanning strategy. *bioRxiv* 2020.04.19.049643 (2020) doi:10.1101/2020.04.19.049643.
22. Corti, D. *et al.* Protective monotherapy against lethal Ebola virus infection by a potently neutralizing antibody. *Science* **351**, 1339–1342 (2016).
23. Pascal, K. E. *et al.* Development of Clinical-Stage Human Monoclonal Antibodies That Treat Advanced Ebola Virus Disease in Nonhuman Primates. *J. Infect. Dis.* **218**, S612–S626 (2018).
24. Mulangu, S. *et al.* A Randomized, Controlled Trial of Ebola Virus Disease Therapeutics. *N. Engl. J. Med.* **381**, 2293–2303 (2019).
25. Subramanian, K. N. *et al.* Safety, tolerance and pharmacokinetics of a humanized monoclonal antibody to respiratory syncytial virus in premature infants and infants with bronchopulmonary dysplasia. MEDI-493 Study Group. *Pediatr. Infect. Dis. J.* **17**, 110–115 (1998).
26. van Mechelen, L., Luytjes, W., de Haan, C. A. M. & Wicht, O. RSV neutralization by palivizumab, but not by monoclonal antibodies targeting other epitopes, is augmented by Fc gamma receptors. *Antiviral Res.* **132**, 1–5 (2016).
27. Kuhn, P. *et al.* Recombinant antibodies for diagnostics and therapy against pathogens and toxins generated by phage display. *Proteomics Clin Appl* **10**, 922–948 (2016).

28. Rülker, T. *et al.* Isolation and characterisation of a human-like antibody fragment (scFv) that inactivates VEEV in vitro and in vivo. *PLoS ONE* **7**, e37242 (2012).
29. Burke, C. W. *et al.* Human-Like Neutralizing Antibodies Protect Mice from Aerosol Exposure with Western Equine Encephalitis Virus. *Viruses* **10**, (2018).
30. Hülseweh, B. *et al.* Human-like antibodies neutralizing Western equine encephalitis virus. *MAbs* **6**, 717–726 (2014).
31. Froude, J. W. *et al.* Generation and characterization of protective antibodies to Marburg virus. *MAbs* **9**, 696–703 (2017).
32. Froude, J. W. *et al.* Post-Exposure Protection in Mice against Sudan Virus by a Two Antibody Cocktail. *Viruses* **10**, (2018).
33. Wrapp, D. *et al.* Cryo-EM structure of the 2019-nCoV spike in the prefusion conformation. *Science* **367**, 1260–1263 (2020).
34. Bleckmann, M. *et al.* Identifying parameters to improve the reproducibility of transient gene expression in High Five cells. *PLoS ONE* **14**, e0217878 (2019).
35. Burger, J. *et al.* Low-Volume Label-Free Detection of Molecule-Protein Interactions on Microarrays by Imaging Reflectometric Interferometry. *SLAS Technol* **22**, 437–446 (2017).
36. Wang, J. *et al.* A Human Bi-specific Antibody against Zika Virus with High Therapeutic Potential. *Cell* **171**, 229-241.e15 (2017).
37. von Behring, E. & Kitasato, S. Über das Zustandekommen der Diphtherie-Immunität und der Tetanus-Immunität bei Thieren. *Deutsche Medizinische Wochenschrift* **16**, 1113–1114 (1890).
38. van Griensven, J. *et al.* Evaluation of Convalescent Plasma for Ebola Virus Disease in Guinea. *N. Engl. J. Med.* **374**, 33–42 (2016).
39. Hung, I. F. *et al.* Convalescent plasma treatment reduced mortality in patients with severe pandemic influenza A (H1N1) 2009 virus infection. *Clin. Infect. Dis.* **52**, 447–456 (2011).
40. Hung, I. F. N. *et al.* Hyperimmune IV immunoglobulin treatment: a multicenter double-blind randomized controlled trial for patients with severe 2009 influenza A(H1N1) infection. *Chest* **144**, 464–473 (2013).
41. Cheng, Y. *et al.* Use of convalescent plasma therapy in SARS patients in Hong Kong. *Eur. J. Clin. Microbiol. Infect. Dis.* **24**, 44–46 (2005).

42. Mair-Jenkins, J. *et al.* The effectiveness of convalescent plasma and hyperimmune immunoglobulin for the treatment of severe acute respiratory infections of viral etiology: a systematic review and exploratory meta-analysis. *J. Infect. Dis.* **211**, 80–90 (2015).
43. Ko, J.-H. *et al.* Challenges of convalescent plasma infusion therapy in Middle East respiratory coronavirus infection: a single centre experience. *Antivir. Ther. (Lond.)* **23**, 617–622 (2018).
44. Perotti, C. *et al.* Plasma from donors recovered from the new Coronavirus 2019 as therapy for critical patients with COVID-19 (COVID-19 plasma study): a multicentre study protocol. *Intern Emerg Med* (2020) doi:10.1007/s11739-020-02384-2.
45. Bloch, E. M. *et al.* Deployment of convalescent plasma for the prevention and treatment of COVID-19. *J. Clin. Invest.* (2020) doi:10.1172/JCI138745.
46. Shen, C. *et al.* Treatment of 5 Critically Ill Patients With COVID-19 With Convalescent Plasma. *JAMA* (2020) doi:10.1001/jama.2020.4783.
47. Krilov, L. R. Palivizumab in the prevention of respiratory syncytial virus disease. *Expert Opin Biol Ther* **2**, 763–769 (2002).
48. Frenzel, A., Schirrmann, T. & Hust, M. Phage display-derived human antibodies in clinical development and therapy. *MAbs* **8**, 1177–1194 (2016).
49. Kügler, J. *et al.* Generation and analysis of the improved human HAL9/10 antibody phage display libraries. *BMC Biotechnol.* **15**, 10 (2015).
50. Robbiani, D. F. *et al.* Convergent Antibody Responses to SARS-CoV-2 Infection in Convalescent Individuals. *bioRxiv* 2020.05.13.092619 (2020) doi:10.1101/2020.05.13.092619.
51. Miethe, S. *et al.* Development of neutralizing scFv-Fc against botulinum neurotoxin A light chain from a macaque immune library. *MAbs* **6**, 446–459 (2014).
52. Herbert, A. S. *et al.* Development of an antibody cocktail for treatment of Sudan virus infection. *Proc. Natl. Acad. Sci. U.S.A.* **117**, 3768–3778 (2020).
53. Rasetti-Escargueil, C. *et al.* The European AntibotABE Framework Program and Its Update: Development of Innovative Botulinum Antibodies. *Toxins (Basel)* **9**, (2017).
54. Wenzel, E. V. *et al.* Human antibodies neutralizing diphtheria toxin in vitro and in vivo. *Sci Rep* **10**, 571 (2020).
55. Wu, Y. *et al.* A noncompeting pair of human neutralizing antibodies block COVID-19 virus binding to its receptor ACE2. *Science* (2020) doi:10.1126/science.abc2241.
56. Iwasaki, A. & Yang, Y. The potential danger of suboptimal antibody responses in COVID-19. *Nat. Rev. Immunol.* (2020) doi:10.1038/s41577-020-0321-6.

57. Ricke, D. O. & Malone, R. W. Medical Countermeasures Analysis of 2019-nCoV and Vaccine Risks for Antibody-Dependent Enhancement (ADE). (2020)  
doi:10.20944/preprints202003.0138.v1.
58. Wan, Y. *et al.* Molecular Mechanism for Antibody-Dependent Enhancement of Coronavirus Entry. *J. Virol.* **94**, (2020).
59. Liu, L. *et al.* Anti-spike IgG causes severe acute lung injury by skewing macrophage responses during acute SARS-CoV infection. *JCI Insight* **4**, (2019).
60. Quinlan, B. D. *et al.* *The SARS-CoV-2 Receptor-Binding Domain Elicits a Potent Neutralizing Response Without Antibody-Dependent Enhancement.*  
<https://papers.ssrn.com/abstract=3575134> (2020).
61. Armour, K. L., Clark, M. R., Hadley, A. G. & Williamson, L. M. Recombinant human IgG molecules lacking Fcγ receptor I binding and monocyte triggering activities. *Eur. J. Immunol.* **29**, 2613–2624 (1999).
62. Schlothauer, T. *et al.* Novel human IgG1 and IgG4 Fc-engineered antibodies with completely abolished immune effector functions. *Protein Eng. Des. Sel.* **29**, 457–466 (2016).
63. Shields, R. L. *et al.* High resolution mapping of the binding site on human IgG1 for Fcγ RI, Fcγ RII, Fcγ RIII, and FcRn and design of IgG1 variants with improved binding to the Fcγ R. *J. Biol. Chem.* **276**, 6591–6604 (2001).
64. Jäger, V. *et al.* High level transient production of recombinant antibodies and antibody fusion proteins in HEK293 cells. *BMC Biotechnol.* **13**, 52 (2013).
65. Bleckmann, M. *et al.* Genomic Analysis and Isolation of RNA Polymerase II Dependent Promoters from *Spodoptera frugiperda*. *PLoS ONE* **10**, e0132898 (2015).
66. Russo, G. *et al.* Parallelized Antibody Selection in Microtiter Plates. *Methods Mol. Biol.* **1701**, 273–284 (2018).
67. Mollova, S., Retter, I., Hust, M., Dübel, S. & Müller, W. Analysis of single chain antibody sequences using the VBASE2 Fab analysis tool. in *Antibody Engineering* 3–10 (Springer Verlag, 2010).
68. Lu, X. *et al.* Deamidation and isomerization liability analysis of 131 clinical-stage antibodies. *MAbs* **11**, 45–57 (2019).
69. Weitzner, B. D. *et al.* Modeling and docking of antibody structures with Rosetta. *Nat Protoc* **12**, 401–416 (2017).

70. Pedotti, M., Simonelli, L., Livoti, E. & Varani, L. Computational docking of antibody-antigen complexes, opportunities and pitfalls illustrated by influenza hemagglutinin. *Int J Mol Sci* **12**, 226–251 (2011).
71. Gray, J. J. *et al.* Protein-protein docking with simultaneous optimization of rigid-body displacement and side-chain conformations. *J. Mol. Biol.* **331**, 281–299 (2003).
72. Simonelli, L. *et al.* Rapid structural characterization of human antibody-antigen complexes through experimentally validated computational docking. *J. Mol. Biol.* **396**, 1491–1507 (2010).
73. Tiller, T. *et al.* A fully synthetic human Fab antibody library based on fixed VH/VL framework pairings with favorable biophysical properties. *MAbs* **5**, 445–470 (2013).
74. Yuan, M. *et al.* A highly conserved cryptic epitope in the receptor binding domains of SARS-CoV-2 and SARS-CoV. *Science* **368**, 630–633 (2020).

## Figures

**Fig. 1 Use of V region genes in human anti-SARS-CoV-2 antibodies.** Comparison of the distribution of V region gene subfamilies in the universal HAL9/10 library <sup>49</sup>, the *in vivo* distribution of subfamilies <sup>73</sup> and the distribution of antibodies against S1 selected from HAL9/10. (A) Abundance of VH, (B) Vk and (C) Vλ.

**Fig. 2 Inhibition of SARS-CoV-2 spike protein binding to cell (flow cytometry).** (A) Inhibition prescreen of 109 scFv-Fc antibodies on ACE2 positive cells using 1500 nM antibody and 50 nM spike protein (30:1 ratio). The antibodies selected for detailed analysis are marked in colors. The antibodies STE73-9-G3 and STE73-7H10 (marked with \*) are identical. (B) IC<sub>50</sub> determination by flow cytometry using 50 nM S1-S2 trimer and 4.7 – 1500 nM antibodies. (C) IC<sub>50</sub> determination by flow cytometry using 10 nM RBD and 0.03-1000 nM antibodies.

**Fig. 3 Determination of EC<sub>50</sub> on RBD.** Binding in titration ELISA of the 17 best inhibiting antibodies on RBD (fusion protein with murine Fc part), S1 (fusion protein with murine Fc part) or S1-S2 (fusion protein with His tag). An unrelated antibody with murine Fc part (TUN219-2C1), human HEK293 cell lysate, BSA and lysozyme were used as controls.

**Fig. 4 Inhibition of SARS-CoV-2 spike protein binding to cells by antibody combinations.** Flow cytometry analysis to determine the inhibition efficacy of antibody combinations on ACE2 positive cells and 50 nM S1-S2 and 1500 nM as a single antibody, respectively 750 nM of each antibody in a combination.

**Fig. 5 Epitope and structure modelling.** A) Overview of the identified minimal epitope regions (MERs) for eight antibodies on RBD. Sequence SARS-CoV-2 (Gene bank QHD43416), SARS-CoV (Uniprot P59594). ACE2 receptor binding residues <sup>74</sup> are marked in yellow. B) Five of the inhibiting antibodies occupy the ACE2 binding region on the RBD (docking models based on epitope data). Two of them (right-most ones) bind to the opposite face of the RBD, suggesting allosteric inhibition. Experimentally validated computational models of the variable regions of the antibodies (coloured cartoons) binding to the RBD (white surface, same orientation in all images) are shown. Amino acid residues

recognized by each antibody in the peptide scanning experiment are marked in green on the RBD surface. The cartoon representation of ACE2 is also shown for comparison.

**Fig. 6 SARS-CoV-2 neutralization.** Neutralization analysis using 250 pfu of SARS-CoV-2 in a CPE based neutralization assay. A) Cell monolayer occupancy at 4 days post infection in absence of neutralizing antibodies was compared to uninfected control cells and median values were normalized as 0 and 100% occupancy, respectively. Histograms indicate medians of normalized monolayer occupancy in a neutralization assay using 1  $\mu\text{g/mL}$  (~10 nM) antibody for each of the 17 tested antibodies. Black dots indicate monolayer occupancy in individual assays (4-6 measurements per sample). B) Representative phase contrast microscopy pictures of uninfected cells, cells infected in absence of antibodies, in the presence of a poorly neutralizing antibody (STE73-2C2) or of a highly neutralizing antibody (STE73-6C8).

**Table 1 Antigen production.**

|                  | High Five cells |                          |                          | Expi293F cells |                          |                          |
|------------------|-----------------|--------------------------|--------------------------|----------------|--------------------------|--------------------------|
|                  | Yield           | Binding to ACE2 in ELISA | Binding to ACE2 on cells | Yield          | Binding to ACE2 in ELISA | Binding to ACE2 on cells |
| <b>RBD-hFc</b>   | 90 mg/L         | yes                      | yes                      | 203 mg/L       | yes                      | yes                      |
| <b>RBD-mFc</b>   | 48 mg/L         | yes                      | yes                      | 116 mg/L       | yes                      | yes                      |
| <b>RBD-His</b>   | 92 mg/L         | yes                      | yes                      | 35 mg/L        | yes                      | yes                      |
| <b>S1-hFc*</b>   | 7 mg/L          | yes                      | yes                      | <1 mg/L        | no                       | no                       |
| <b>S1-hFc</b>    | 50 mg/L         | yes                      | yes                      | <1 mg/L        | weak                     | yes                      |
| <b>S1-mFc</b>    | 36 mg/L         | yes                      | yes                      | <1 mg/L        | yes                      | yes                      |
| <b>S1-His</b>    | 15 mg/L         | yes                      | yes                      | <1 mg/L        | weak                     | no                       |
| <b>S1-S2-His</b> | 8 mg/L          | yes                      | yes                      | <1 mg/L        | no                       | no                       |

Max. production yields of SARS-CoV-2 spike protein/domains in insect cells (High Five) and mammalian cells (Expi293F). Proteins with His-tag produced in High Five cells and S1-hFc\* were additionally purified by SEC. \* with Furin site.



**Table 2 Antibody selection strategies using the human naive antibody gene libraries HAL9/10.**

| <b>Antibody selection campaign</b> | <b>library</b> | <b>target</b> | <b>panning rounds</b> | <b>binders/ screened clones</b> | <b>unique antibodies</b> | <b>cloned as scFv-Fc</b> | <b>inhibiting antibodies</b> |
|------------------------------------|----------------|---------------|-----------------------|---------------------------------|--------------------------|--------------------------|------------------------------|
| STE70                              | HAL9/10        | S1-hFc (Hi5)  | 4                     | 7/ 94                           | 7                        | 7                        | 1                            |
| STE72                              | HAL10 (kappa)  | S1-hFc (Hi5)  | 4                     | 397/ 752                        | 90                       | 44                       | 8                            |
| STE73                              | HAL9 (lambda)  | S1-hFc (Hi5)  | 4                     | 519/ 846                        | 209                      | 59                       | 8                            |
| STE77                              | HAL10 (kappa)  | S1-hFc (Expi) | 4                     | 7/ 564                          | 2                        | n.a.                     | n.a.                         |
| STE78                              | HAL9 (lambda)  | S1-hFc (Expi) | 4                     | 10/ 282                         | 1                        | n.a.                     | n.a.                         |

n.a. = not applicable

**Table 3 Overview on inhibiting antibodies.**

| Antibody name | VH       | VL        | EC50 ELISA [nM] |      |       | Flow cytometry spike binding inhibition assay |                                 |                           |                               | SARS-CoV-2 neutralization [%] |
|---------------|----------|-----------|-----------------|------|-------|-----------------------------------------------|---------------------------------|---------------------------|-------------------------------|-------------------------------|
|               |          |           | RBD             | S1   | S1-S2 | IC 50 [nM] with 50 nM spike                   | Molar ratio antibody arm: spike | IC 50 [nM] with 10 nM RBD | Molar ratio antibody arm: RBD |                               |
| STE70-1E12    | IGHV1-2  | IGLV6-57  | 1.1             | 1.5  | 13.3  | 180                                           | 7.2                             | 3.2                       | 0.64                          | 98                            |
| STE72-1B6     | IGHV3-23 | IGKV1-12  | 1.6             | 2.2  | 4.4   | 240                                           | 9.6                             | 4.8                       | 0.96                          | 90                            |
| STE72-1G5     | IGHV1-69 | IGKV3-20  | 8.9             | 10.7 | 16.3  | n.d.                                          | n.d.                            | n.d.                      | n.d.                          | 77                            |
| STE72-4C10    | IGHV3-30 | IGKV1D-39 | 1.7             | 3.2  | 7.4   | 117                                           | 4.8                             | 3.5                       | 0.7                           | 87                            |
| STE72-4E12    | IGHV1-46 | IGKV3-15  | 4.7             | 10.4 | 11.6  | n.d.                                          | n.d.                            | 3.0                       | 0.6                           | 99                            |
| STE72-8A2     | IGHV1-18 | IGKV1D-33 | 1.5             | 2.3  | 2.6   | 35                                            | 1.4                             | 1.5                       | 0.3                           | 97                            |
| STE72-8A6     | IGHV1-18 | IGKV1-5   | 1.5             | 2.9  | 3.7   | 102                                           | 4.0                             | 2.8                       | 0.56                          | 100                           |
| STE72-8E1     | IGHV4-61 | IGKV1-5   | 1.4             | 2.4  | 2     | 20                                            | 0.8                             | 5.6                       | 1.1                           | 85                            |
| STE72-2G4     | IGHV1-2  | IGLV2-8   | 0.7             | 0.9  | 1     | 37                                            | 1.4                             | 3.7                       | 0.74                          | 86                            |
| STE73-2B2     | IGHV1-2  | IGLV6-57  | 0.5             | 0.8  | 1     | 63                                            | 2.6                             | 1.7                       | 0.4                           | 75                            |
| STE73-2C2     | IGHV3-66 | IGLV6-57  | 9.6             | 17.9 | 24.5  | 59                                            | 2.4                             | 3.0                       | 0.6                           | 70                            |
| STE73-2E9     | IGHV1-18 | IGLV1-36  | 0.7             | 0.6  | 0.5   | 20                                            | 0.8                             | 3.4                       | 0.68                          | 90                            |
| STE73-2G8     | IGHV3-66 | IGLV3-19  | 0.7             | 1    | 1.4   | 23                                            | 1.0                             | 2.8                       | 0.56                          | 98                            |
| STE73-6B10    | IGHV1-2  | IGLV2-11  | 17.3            | 15.3 | 63.4  | 612                                           | 24                              | 73                        | 14.6                          | 90                            |
| STE73-6C1     | IGHV3-30 | IGLV1-40  | 2               | 2.8  | 5.5   | 97                                            | 3.8                             | 4.1                       | 0.81                          | 100                           |
| STE73-6C8     | IGHV1-69 | IGLV6-57  | 3.3             | 6    | 17    | 332                                           | 13.2                            | 5.4                       | 1.08                          | 100                           |
| STE73-9G3     | IGHV3-23 | IGLV1-40  | 1.4             | 1.6  | 2.8   | 40                                            | 1.6                             | 3.4                       | 0.6                           | 100                           |

V-genes were determined by VBASE2 (vbase2.org)<sup>64</sup>. The EC50 were measured on 30 ng immobilized RBD-mFc, S1-mFc, S1-S2-His (trimer) by ELISA. The IC50 was measured by flow cytometry using 50 nM (in relation to monomer) S1-S2 trimer, respectively 10 nM RBD and ACE2 positive cells. The molar ration of antibody binding site: S1-S2 or RBD is given for 50% inhibition. N.D.: not determinable. The neutralization assay was performed with 250 pfu/well SARS-CoV-2 and 1 µg/ml (~100 nM) (median neutralization %).

A

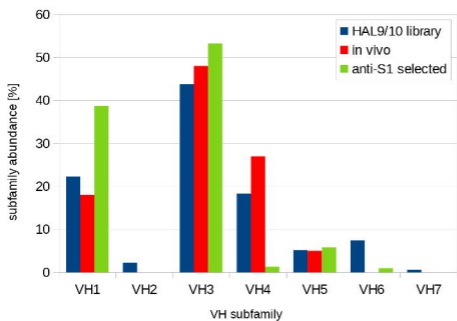

B

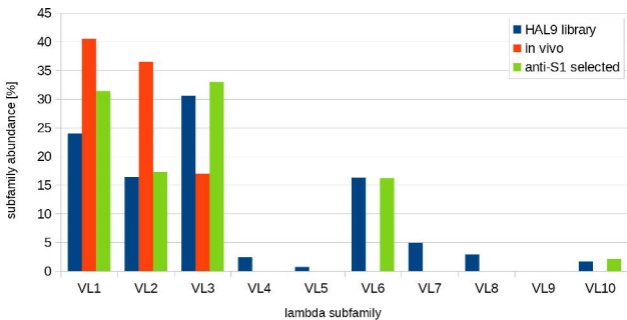

C

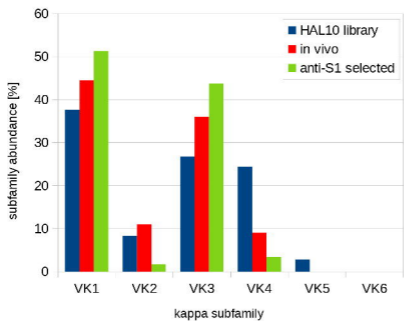

A

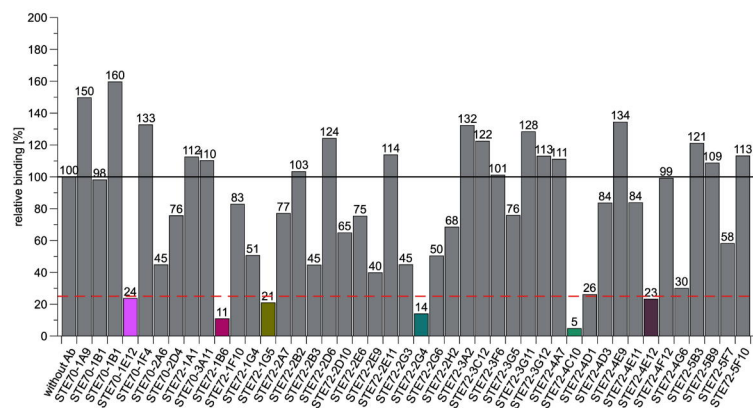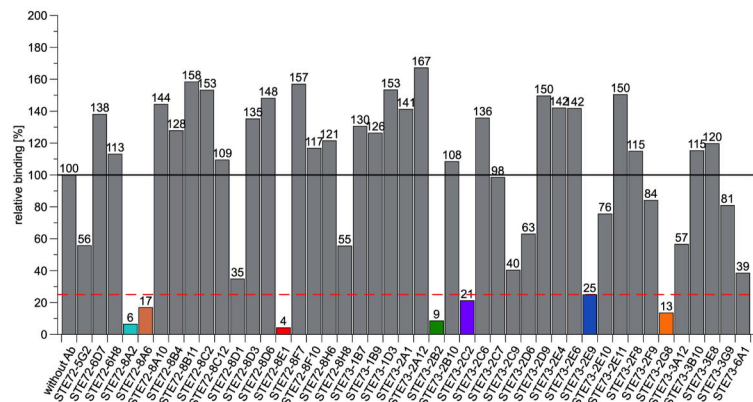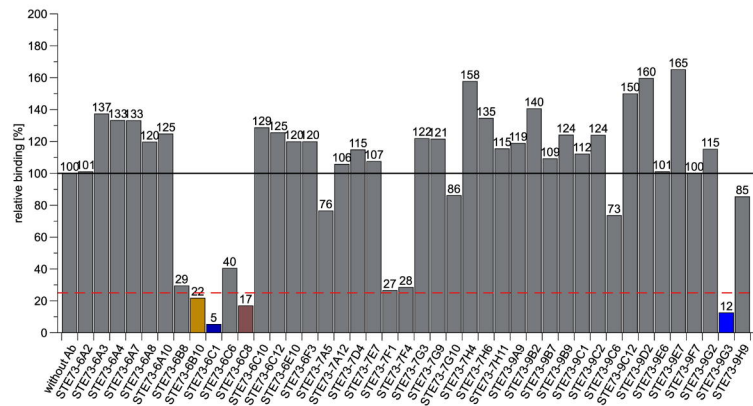

B

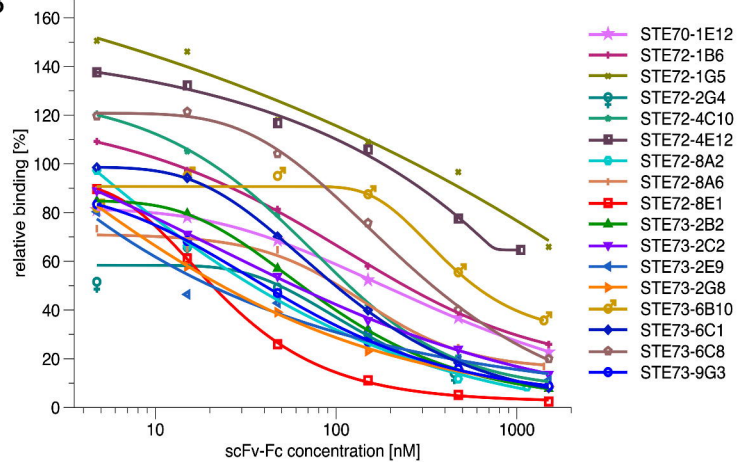

C

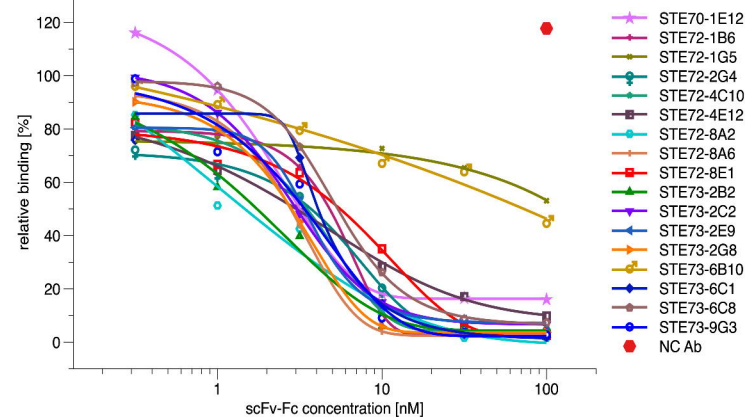

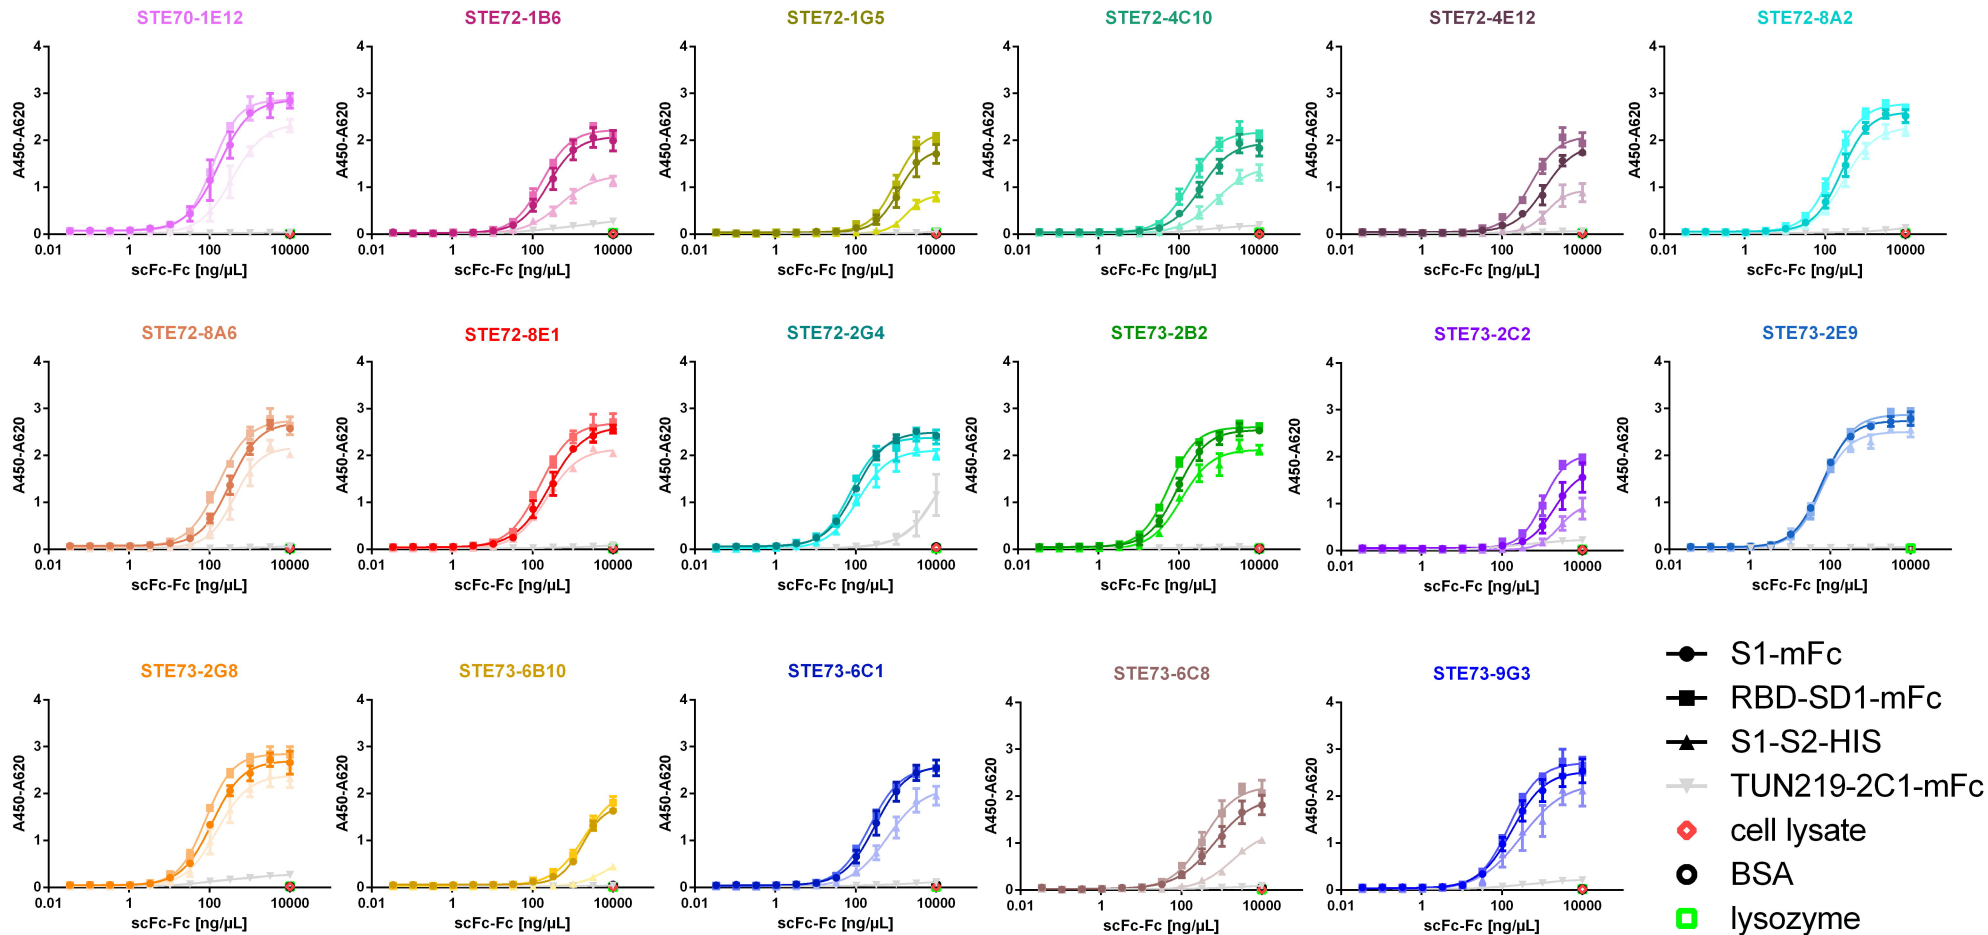

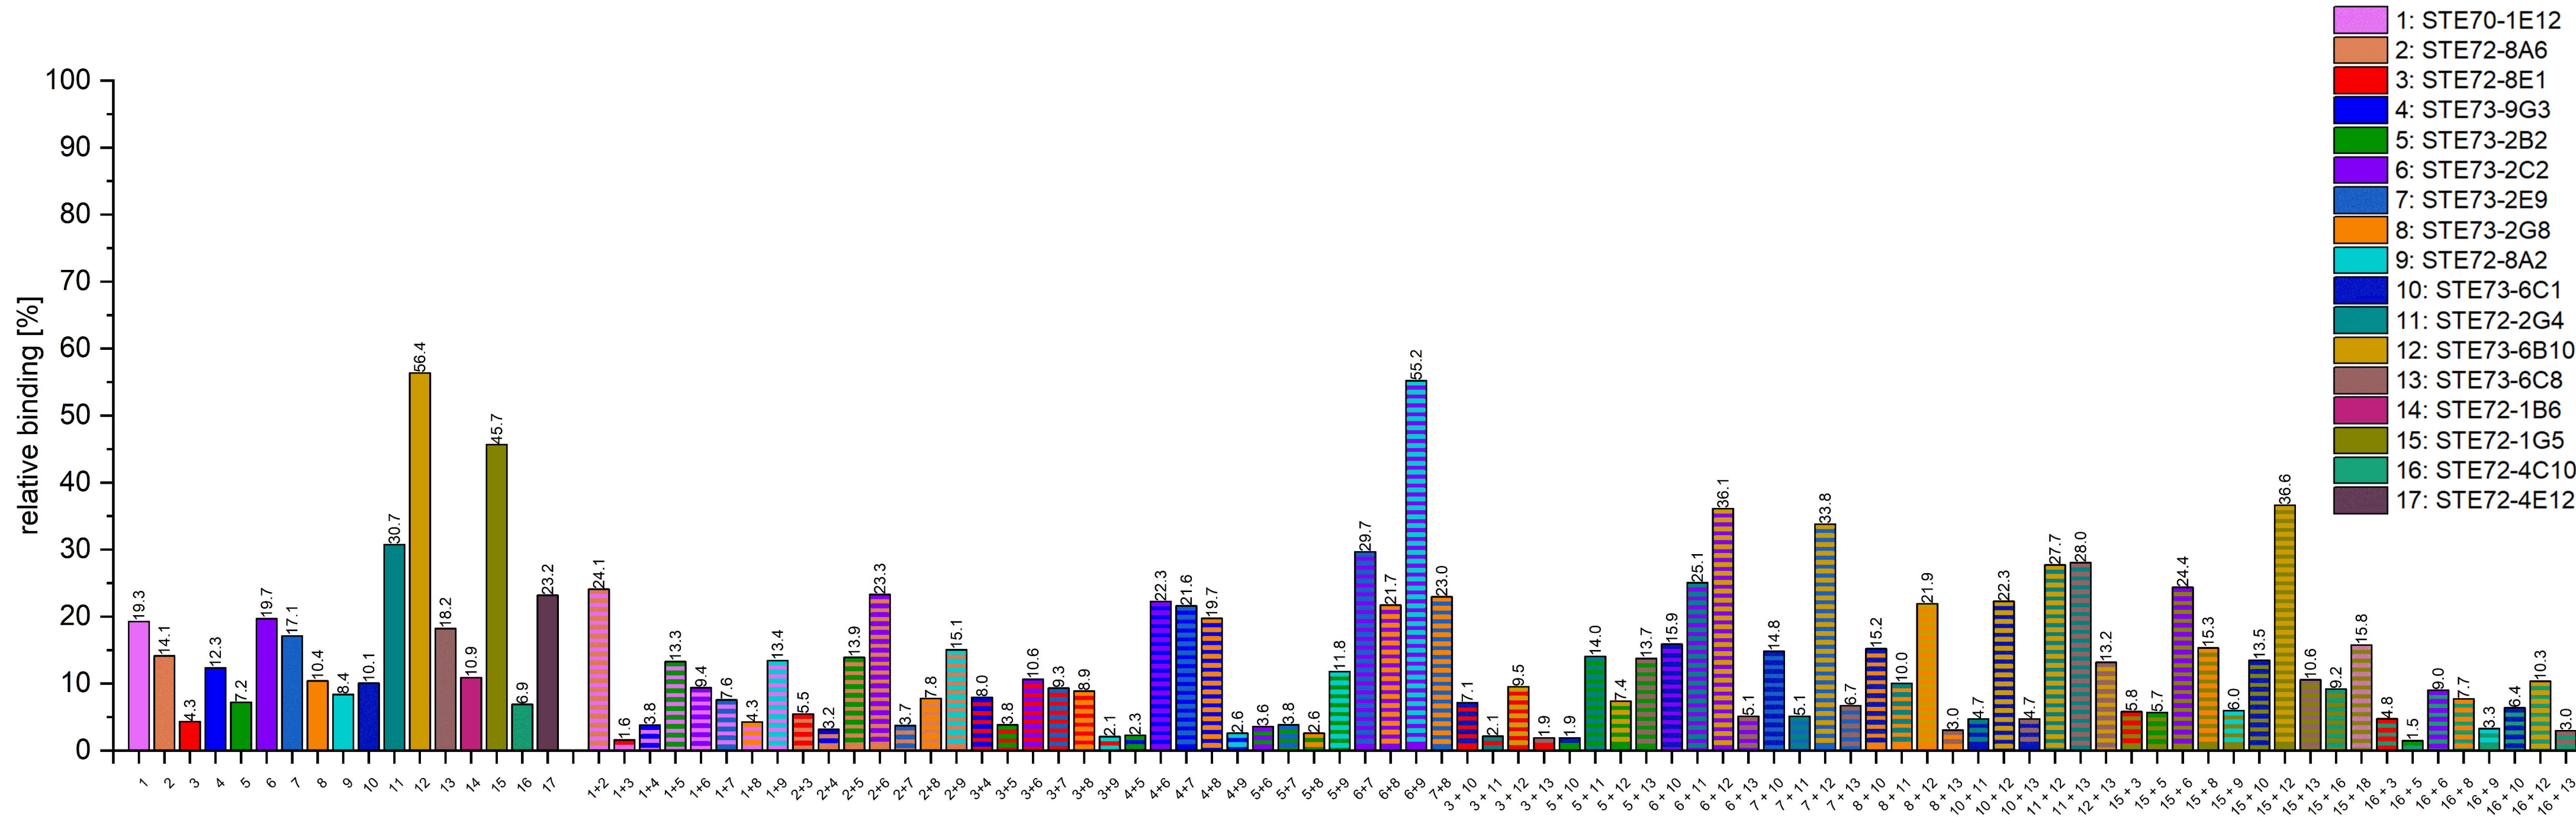

**A**

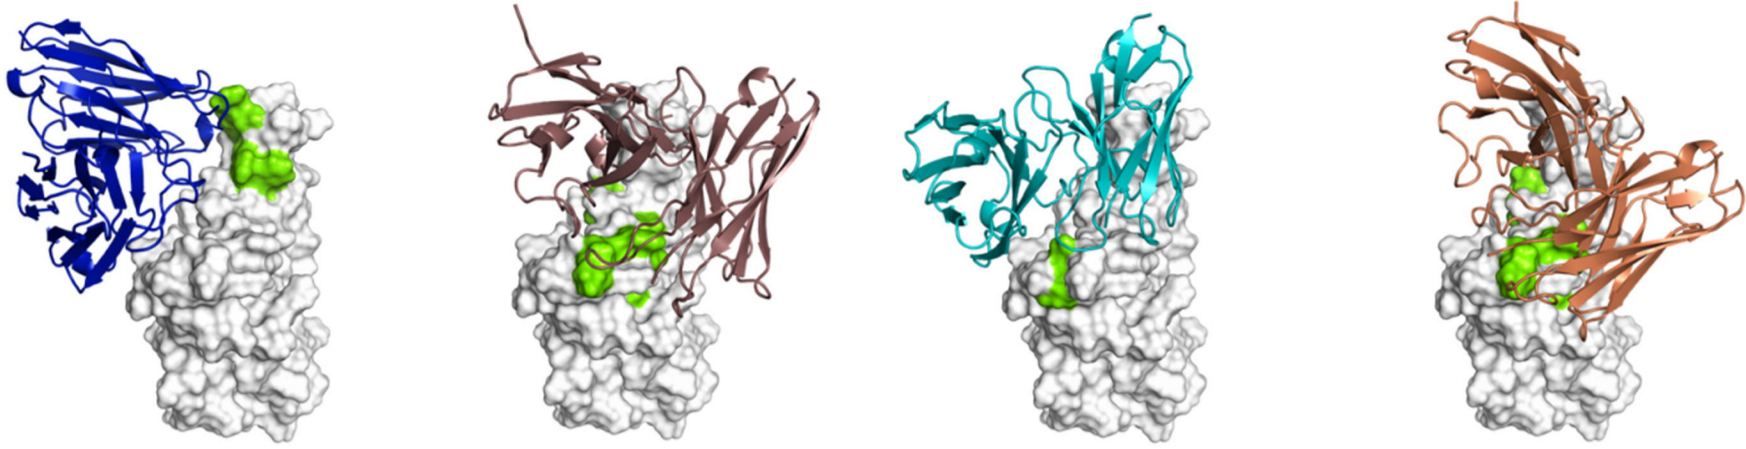

**STE73-6C1**

**STE73-6C8**

**STE72-8A2**

**STE72-8A6**

bioRxiv preprint doi: <https://doi.org/10.1101/2020.06.05.135921>; this version posted June 5, 2020. The copyright holder for this preprint (which was not certified by peer review) is the author/funder, who has granted bioRxiv a license to display the preprint in perpetuity. It is made available under aCC-BY-NC-ND 4.0 International license.

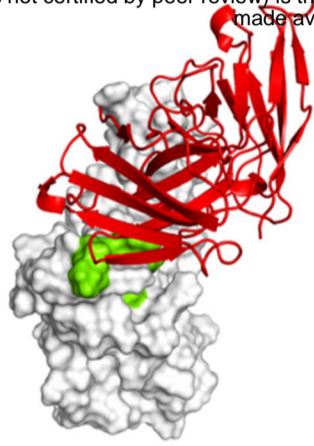

**STE72-8E1**

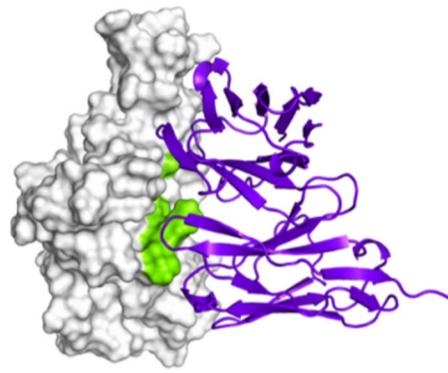

**STE73-2C2**

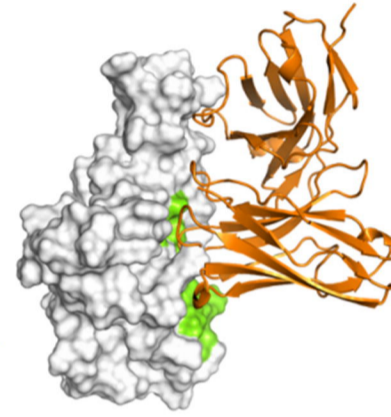

**STE73-2G8**

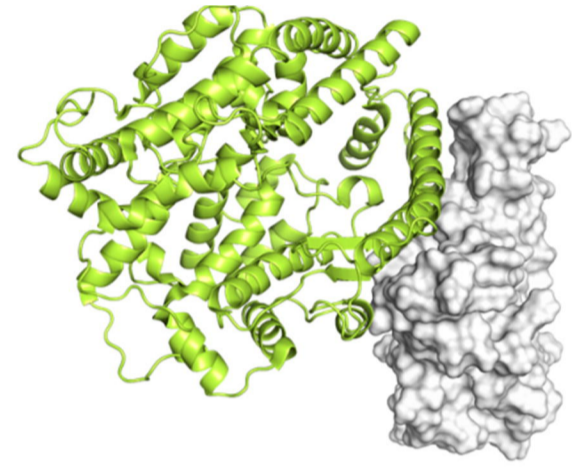

**ACE2**

**B**

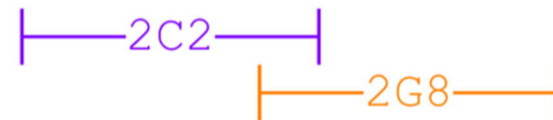

|            |     |                                                    |     |
|------------|-----|----------------------------------------------------|-----|
| SARS-CoV-2 | 319 | RVQPTESIVRFPNITNLCPFGEVFNATRFASVYAWNRRKISNCVADYSVL | 368 |
| SARS-CoV   | 306 | RVVPSGDVVRFPNITNLCPFGEVFNATKFPVYAWERKKISNCVADYSVL  | 355 |

|            |     |                                                     |     |
|------------|-----|-----------------------------------------------------|-----|
| SARS-CoV-2 | 369 | YNSASFSTFKCYGVSPTKLNDLCFTNVYADSFVIRGDEVQRQIAPGQTGKI | 418 |
| SARS-CoV   | 356 | YNSTFFSTFKCYGVSA TKLNDLCFSNVYADSFVVKGDDVRQIAPGQTGVI | 405 |

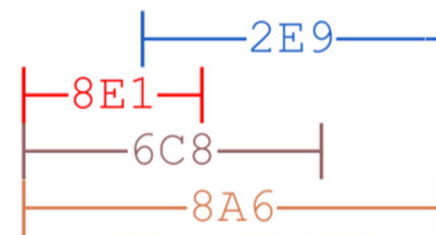

|            |     |                                                                              |     |
|------------|-----|------------------------------------------------------------------------------|-----|
| SARS-CoV-2 | 419 | ADYNYKLPDDFTGCVIAWNSNNLDSKVGGN <sup>Y</sup> NYLYR <sup>L</sup> FRKSNLKPFERDI | 468 |
| SARS-CoV   | 406 | ADYNYKLPDDFMGCVLAWNTRNIDATSTGN <sup>Y</sup> NYKYR <sup>L</sup> LRHGKLRPFERDI | 455 |

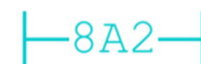

|            |     |                                                    |     |
|------------|-----|----------------------------------------------------|-----|
| SARS-CoV-2 | 469 | STEIYQAGSTPCNGVEGFNCYFPLQSYGFQPTNGVGYQPYRVVLSFELL  | 518 |
| SARS-CoV   | 456 | SNVPFSPDGKPC TP-PALNCYWPLNDYGFYTTTGIGYQPYRVVLSFELL | 505 |

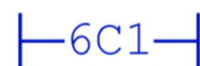

|            |     |                          |     |
|------------|-----|--------------------------|-----|
| SARS-CoV-2 | 519 | HAPATVCGPKKSTNLVKNKCVNFN | 542 |
| SARS-CoV   | 506 | NAPATVCGPKLSTDLIKNQCVNFN | 529 |

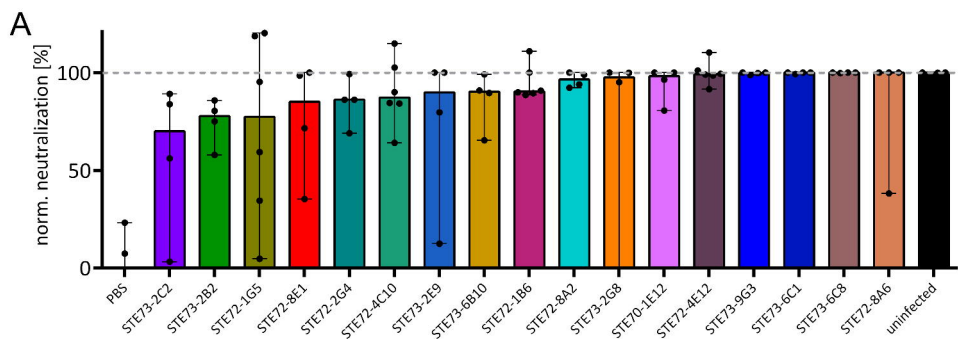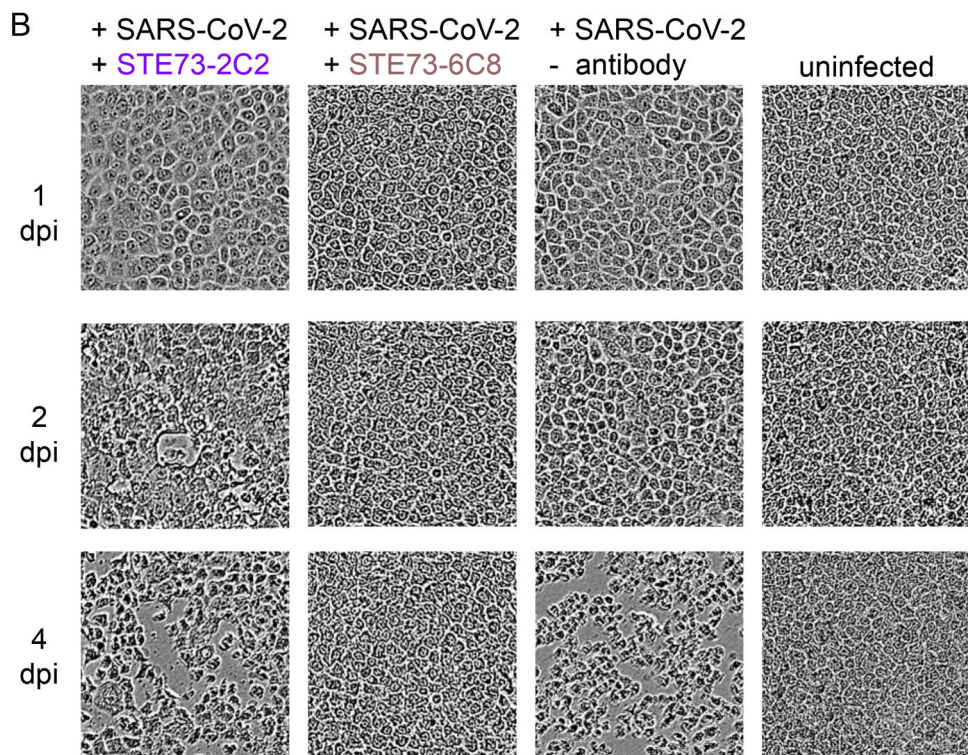

Source: http://biorxiv.org/content/10.1101/2020.06.05.135921v1.full.pdf
